# Supplementary material for: Addressing Mental Health in a Changing Climate: Incorporating Mental Health Indicators into Climate Change and Health Vulnerability and Adaptation Assessments
Source: PubMed Central journal article supplement (PMC6164893; doi:10.3390/ijerph15091806), 2018-08-22
Supplement: ijerph-15-01806-s001.pdf [file ijerph-15-01806-s001.pdf]

## Supplementary Material

**Table S1.** Summary of Articles Included in Review

| Article # | Article Citation     | Country             | Literature Type                                                      | Study Design (where applicable)                              | Participants                                                                          | Outcomes Measured                                                                                                                    |
|-----------|----------------------|---------------------|----------------------------------------------------------------------|--------------------------------------------------------------|---------------------------------------------------------------------------------------|--------------------------------------------------------------------------------------------------------------------------------------|
| 1.        | Adger et al. (2011)  | Maldives and Canada | Empirical Research Article                                           | Qualitative Case Study                                       | Case study of Pacific Islanders of Atolls and Inuit in the Canadian Arctic            | Relationship to place (emotional, symbolic, environmental, spiritual)                                                                |
| 2.        | Ager et al. (2015)   | International       | Empirical Research Article                                           | Qualitative interviews and document analysis                 | Humanitarian and Non-Governmental Organizations                                       | Emergency response (including local faith-based community response), disaster risk reduction, transitional and sustainable solutions |
| 3.        | Agnew et al. (2012)  | Global              | Literature Review – Theoretical review (of crime and climate change) | N/A                                                          | N/A                                                                                   | N/A                                                                                                                                  |
| 4.        | Aiena et al. (2015)  | USA                 | Empirical Research Article                                           | Quantitative survey (Measuring resilience with RS 14)        | Adults post-gulf oil spill and university students                                    | Resilience related to environmental degradation                                                                                      |
| 5.        | Aiena, et al. (2016) | USA                 | Empirical Research Article                                           | Quantitative survey (Measuring resilience, meaning and PTSD) | Mississippi coastal residents (perceived effect group and non-perceived effect group) | Perceptions of meaning, resilience, and Post-Traumatic Stress Disorder related to                                                    |

| Article # | Article Citation          | Country       | Literature Type                                                           | Study Design (where applicable)                                                                                                                                                                                                    | Participants                                                                                               | Outcomes Measured                                                                                                     |
|-----------|---------------------------|---------------|---------------------------------------------------------------------------|------------------------------------------------------------------------------------------------------------------------------------------------------------------------------------------------------------------------------------|------------------------------------------------------------------------------------------------------------|-----------------------------------------------------------------------------------------------------------------------|
|           |                           |               |                                                                           |                                                                                                                                                                                                                                    |                                                                                                            | environmental degradation                                                                                             |
| 6.        | Aitsi-Selmi et al. (2015) | International | Literature Review – Narrative Review (Health and wellbeing post disaster) | N/A                                                                                                                                                                                                                                | N/A                                                                                                        | N/A                                                                                                                   |
| 7.        | Ajibade et al. (2015)     | Nigeria       | Empirical Research Article                                                | Quantitative Survey (13 Item Additive Scale – questions pertained to whether or not respondents had experienced: damage to properties, impacts to individual health, restricted movement, infrastructure damage, and loss of lives | 1003 flood impacted Nigerians in Lagos                                                                     | Flood impacts based on a bio-psychosocial model of socio-economic, demographic, behavioural and environmental factors |
| 8.        | Ajibade et al. (2013)     | Nigeria       | Empirical Research Article                                                | Mixed methods (Interviews, survey and focus groups)                                                                                                                                                                                | Women in Lagos, Nigeria who experienced flash floods; 36 interviews, a survey (n = 453) and 6 focus groups | Vulnerability and resilience among flooded women in Lagos, Nigeria                                                    |

| Article # | Article Citation        | Country                                                             | Literature Type                                                                               | Study Design (where applicable)                                                                                    | Participants                                                                                                                                                                   | Outcomes Measured                                             |
|-----------|-------------------------|---------------------------------------------------------------------|-----------------------------------------------------------------------------------------------|--------------------------------------------------------------------------------------------------------------------|--------------------------------------------------------------------------------------------------------------------------------------------------------------------------------|---------------------------------------------------------------|
| 9.        | Alberini et al. (2006). | International                                                       | Empirical Research Article                                                                    | Quantitative – survey (conjoint choice questions about adaptive capacity to climate change)                        | 100 Climate change (climatologists), public health professionals, and emergency response professionals                                                                         | Perceptions about adaptive capacity to climate change         |
| 10.       | Albrecht et al. (2007)  | Australia                                                           | Empirical Research Article                                                                    | Mixed Methods (qualitative interviews; ethnographic field work, surveys using the Environmental Distress ED scale) | Interviews with 60 people living in Upper Hunter (region with persistent drought and mining).<br><br>Ethnographic field work and surveys with residents of Upper Hunter region | Distress related to environmental change (drought and mining) |
| 11.       | Albrecht (2011)         | Globally - examples mainly based in Australia; also refers to Inuit | Grey Literature (chronic climate change and psychosocial effects – psychoterrative syndromes) | N/A                                                                                                                | N/A                                                                                                                                                                            | N/A                                                           |
| 12.       | Alderman, et al. (2012) | Australia                                                           | Literature review - systematic review (Flood and human health)                                | N/A                                                                                                                | N/A                                                                                                                                                                            | N/A                                                           |

| Article # | Article Citation       | Country                        | Literature Type                                                                     | Study Design (where applicable)                                                  | Participants                                                                                                                    | Outcomes Measured                                                            |
|-----------|------------------------|--------------------------------|-------------------------------------------------------------------------------------|----------------------------------------------------------------------------------|---------------------------------------------------------------------------------------------------------------------------------|------------------------------------------------------------------------------|
| 13.       | Alderman et al. (2013) | Australia                      | Empirical Research Article                                                          | Quantitative - Survey (Kessler 6 scale and the PTSD civilian checklist PCL-C 19) | 960 flood affected people (during the 2011 Brisbane summer floods) in Australia                                                 | Health effects (physical and mental) of 2011 flooding in Brisbane, Australia |
| 14.       | Allen et al. (2014).   | Global                         | Literature Review – Narrative review of social factors that influence mental health | N/A                                                                              | N/A                                                                                                                             | N/A                                                                          |
| 15.       | Almedom et al. (2008)  | Global                         | Literature Review – Narrative Review on resilience research (policy and practice)   | N/A                                                                              | N/A                                                                                                                             | N/A                                                                          |
| 16.       | Almedom, et al. (2007) | Eritrea                        | Empirical Research Article                                                          | Quantitative – Survey (Sense of Coherence SOC scale)                             | 265 men and women in Eritrea who have been displaced from rural and urban areas (compared to those who have not been displaced) | Resilience related to displacement                                           |
| 17.       | Almedom et al. (2015)  | Not specified                  | Literature Review – theoretical review                                              | N/A                                                                              | N/A                                                                                                                             | N/A                                                                          |
| 18.       | Ampuero et al., (2015) | Chile (Robinson Crusoe Island) | Empirical Research Article                                                          | Qualitative - Mental wellbeing impact assessment                                 | Residents of Robinson Crusoe Island                                                                                             | Resilience related to: natural environment, meaningful activities,           |

| Article # | Article Citation       | Country         | Literature Type                                                     | Study Design (where applicable)                                                                  | Participants                                                                                              | Outcomes Measured                                              |
|-----------|------------------------|-----------------|---------------------------------------------------------------------|--------------------------------------------------------------------------------------------------|-----------------------------------------------------------------------------------------------------------|----------------------------------------------------------------|
|           |                        |                 |                                                                     | (post disaster) via interviews and fieldwork observations                                        |                                                                                                           | food, social activities, education, transport and security.    |
| 19.       | Anderson (2009)        | Australia       | Empirical Research Article                                          | Qualitative – ethnographic case study via oral histories                                         | Rural dwellers in dryland farm communities of the semiarid Victorian Mallee                               | Lived experience of coping with climate change related-drought |
| 20.       | Anderson et al. (2011) | Global          | Literature Review – Narrative Review of mental health and wellbeing | N/A                                                                                              | N/A                                                                                                       | N/A                                                            |
| 21.       | Anderson et al. (2017) | USA             | Literature Review – Climate change and health assessments           | N/A                                                                                              | N/A                                                                                                       | N/A                                                            |
| 22.       | Asugeni et al. (2015)  | Solomon Islands | Empirical Research Article                                          | Mixed methods research - cross-sectional study (survey including close and open ended questions) | Residents of six low-lying villages in East Malaita, Solomon Islands.<br><br>57 questionnaire respondents | Mental health effect of rising sea levels                      |
| 23.       | Austin et al., (2015)  | Canada          | Literature Review – Narrative review (public health                 | N/A                                                                                              | N/A                                                                                                       | N/A                                                            |

| Article # | Article Citation       | Country   | Literature Type                                                                                                                     | Study Design (where applicable) | Participants                                               | Outcomes Measured                                                                    |
|-----------|------------------------|-----------|-------------------------------------------------------------------------------------------------------------------------------------|---------------------------------|------------------------------------------------------------|--------------------------------------------------------------------------------------|
|           |                        |           | adaptation to climate change)                                                                                                       |                                 |                                                            |                                                                                      |
| 24.       | Azuma et al. (2014)    | Japan     | Empirical Research Article                                                                                                          | Quantitative – Survey           | Flooded residents (379 respondents) in six areas of Japan. | Health status (physical and mental) of residents with water-damaged homes post-flood |
| 25.       | Bajayo (2012)          | Australia | Literature Review – Narrative Review (community resilience to climate change via public health planning)                            | N/A                             | N/A                                                        | N/A                                                                                  |
| 26.       | Bardsley et al. (2012) | Australia | Literature Review – Narrative Review (climate change vulnerability for the Alinytjara Wilurara Natural Resources Management region) | N/A                             | N/A                                                        | N/A                                                                                  |
| 27.       | Barnett et al. (2015)  | Australia | Literature Review – Narrative Review (climate change adaptation)                                                                    | N/A                             | N/A                                                        | N/A                                                                                  |

| Article # | Article Citation        | Country       | Literature Type                                                                                                | Study Design (where applicable)                                                               | Participants                                                   | Outcomes Measured                                     |
|-----------|-------------------------|---------------|----------------------------------------------------------------------------------------------------------------|-----------------------------------------------------------------------------------------------|----------------------------------------------------------------|-------------------------------------------------------|
| 28.       | Bei et al. (2013)       | Australia     | Empirical Research Article                                                                                     | Quantitate – Survey (surveying for anxiety, PTSD, self-report health, satisfaction with life) | 274 older adults (age 60+) before and after flood exposure     | Health outcomes (physical and mental) of older adults |
| 29.       | Bélangier et al. (2014) | Canada        | Empirical Research Article                                                                                     | Mixed Methods (Survey and interviews - cross-sectional household survey)                      | Residents of low income neighbourhoods (in 9 cities in Canada) | Adverse health effects of heat                        |
| 30.       | Bell (2012)             | USA           | Literature Review – Narrative Review (whole-systems approach for climate change and health policies)           | N/A                                                                                           | N/A                                                            | N/A                                                   |
| 31.       | Bergström et al. 2014   | Not specified | Literature Review – Theoretical review (macro, micro, meso understanding of resilience – nature of resilience) | N/A                                                                                           | N/A                                                            | N/A                                                   |
| 32.       | Berkes et al. (2013)    | Not specified | Literature Review – Narrative Review (on community resilience from a                                           | N/A                                                                                           | N/A                                                            | N/A                                                   |

| Article # | Article Citation     | Country   | Literature Type                                                                                                    | Study Design (where applicable)                                                  | Participants                                                                | Outcomes Measured                              |
|-----------|----------------------|-----------|--------------------------------------------------------------------------------------------------------------------|----------------------------------------------------------------------------------|-----------------------------------------------------------------------------|------------------------------------------------|
|           |                      |           | social-ecological systems perspective and from the psychology of development and mental health)                    |                                                                                  |                                                                             |                                                |
| 33.       | Berry et al. (2008a) | Australia | Empirical Research Article                                                                                         | Quantitative – Analysis of statistic census geographic system                    | Residents of rural Australia                                                | Mental health effects of climate change        |
| 34.       | Berry et al. (2008b) | Australia | Literature Review – Narrative Review (Rural mental health implications of climate change)                          | N/A                                                                              | N/A                                                                         | N/A                                            |
| 35.       | Berry et al. (2009a) | Australia | Empirical Research Article                                                                                         | Quantitative - Survey (self-report on social capital and psychological distress) | 963 Residents of Eurobella Shire in New South Wales, Australia (aged 19-97) | Social capital's relationship to mental health |
| 36.       | Berry et al. (2009b) | Global    | Literature Review – Narrative Review (Climate change impacts to mental health and opportunities for public health) | N/A                                                                              | N/A                                                                         | N/A                                            |



| Article # | Article Citation          | Country                    | Literature Type                                                                                                                    | Study Design<br>(where applicable) | Participants | Outcomes Measured |
|-----------|---------------------------|----------------------------|------------------------------------------------------------------------------------------------------------------------------------|------------------------------------|--------------|-------------------|
| 37.       | Berry et al.,<br>(2010a)  | Global                     | Literature Review<br>– Narrative<br>Review (mental<br>health risks and<br>impacts from<br>climate change)                          | N/A                                | N/A          | N/A               |
| 38.       | Berry et al.,<br>(2010b)  | Australia                  | Literature Review<br>– Narrative<br>Review (climate<br>change and mental<br>health adaptation)                                     | N/A                                | N/A          | N/A               |
| 39.       | Berry et al.<br>(2011)    | Australia                  | Literature Review<br>– Review of<br>epidemiological<br>research on<br>Farmer’s mental<br>health risks related<br>to climate change | N/A                                | N/A          | N/A               |
| 40.       | Birkmann et al.<br>(2010) | Sri Lanka and<br>Indonesia | Literature Review<br>– Narrative<br>Review (Response<br>related to climate<br>related extreme<br>events and<br>disasters)          | N/A                                | N/A          | N/A               |
| 41.       | Bonanno<br>(2012)         | Not Specified              | Literature Review<br>– Narrative<br>Review<br>(Resilience<br>constructs related                                                    | N/A                                | N/A          | N/A               |

| Article # | Article Citation      | Country                   | Literature Type                                                                                                      | Study Design (where applicable) | Participants | Outcomes Measured |
|-----------|-----------------------|---------------------------|----------------------------------------------------------------------------------------------------------------------|---------------------------------|--------------|-------------------|
|           |                       |                           | to psychosocial health)                                                                                              |                                 |              |                   |
| 42.       | Bourque et al. (2014) | Canada                    | Literature Review – Narrative Review (Climate change as an opportunity for public mental health)                     | N/A                             | N/A          | N/A               |
| 43.       | Bowles (2015)         | Australia                 | Literature Review – Narrative Review (Climate change and health adaptation (physical and mental) amongst indigenous) | N/A                             | N/A          | N/A               |
| 44.       | Bragg et al. (2012)   | Australia and New Zealand | Literature Review – Narrative Review (Ecopsychology and environmental/ecological change)                             | N/A                             | N/A          | N/A               |
| 45.       | Brown (2015)          | Global                    | Grey Literature (Resilience, development and global change)                                                          | N/A                             | N/A          | N/A               |
| 46.       | Brown et al. (2011)   | Not specified             | Literature Review – Narrative                                                                                        | N/A                             | N/A          | N/A               |

| Article # | Article Citation          | Country       | Literature Type                                                                                    | Study Design (where applicable)                                             | Participants            | Outcomes Measured                                              |
|-----------|---------------------------|---------------|----------------------------------------------------------------------------------------------------|-----------------------------------------------------------------------------|-------------------------|----------------------------------------------------------------|
|           |                           |               | Review (resilience, agency, capacity related to environmental change)                              |                                                                             |                         |                                                                |
| 47.       | Bunch (2011)              | Not specified | Literature Review – Narrative Review (social-ecological resilience, health and well-being)         | N/A                                                                         | N/A                     | N/A                                                            |
| 48.       | Bunyavanich et al. (2003) | Not specified | Literature Review – Narrative Review (climate change impacts on child health)                      | N/A                                                                         | N/A                     | N/A                                                            |
| 49.       | Burch et al. (2014)       | Canada,       | Literature Review – Narrative Review (Transformational change related to climate change responses) | N/A                                                                         | N/A                     | N/A                                                            |
| 50.       | Burch et al. (2010)       | Canada, BC    | Empirical Research Article                                                                         | Qualitative - Case Studies in three municipalities in British Columbia (BC) | Three BC municipalities | Municipal action on climate change (adaptation and mitigation) |

| Article # | Article Citation     | Country | Literature Type                                                                                                                                                 | Study Design (where applicable)                                                                   | Participants               | Outcomes Measured                   |
|-----------|----------------------|---------|-----------------------------------------------------------------------------------------------------------------------------------------------------------------|---------------------------------------------------------------------------------------------------|----------------------------|-------------------------------------|
| 51.       | Burton et al. (2016) | Canada  | Literature Review – Narrative Review (Psychosocial and physical health consequences of flooding)                                                                | N/A                                                                                               | N/A                        | N/A                                 |
| 52.       | Butler et al, (2014) | Global  | Literature Review – Narrative Review (climate change impacts on mental health and cognition)                                                                    | N/A                                                                                               | N/A                        | N/A                                 |
| 53.       | Berkes, (2001)       | Canada  | Empirical Research Article                                                                                                                                      | Qualitative – Case Study of the adaptive capacity to climate change of residents of Sachs Harbour | Residents of Sachs Harbour | Adaptive capacity to climate change |
| 54.       | Cameron (2012)       | Canada  | Literature Review – Narrative Review (Critique of vulnerability and adaptation approaches (related to climate change) for Indigenous peoples in Canada’s arctic | N/A                                                                                               | N/A                        | N/A                                 |

| Article # | Article Citation        | Country       | Literature Type                                                               | Study Design (where applicable)                                                                 | Participants                                                                                       | Outcomes Measured                                                   |
|-----------|-------------------------|---------------|-------------------------------------------------------------------------------|-------------------------------------------------------------------------------------------------|----------------------------------------------------------------------------------------------------|---------------------------------------------------------------------|
| 55.       | Cardwell et al. (2013)  | Canada        | Empirical Research Article                                                    | Qualitative – Semi-structured interviews about perceptions of climate change and health         | 22 residents of Golden Horseshoe (Southern Ontario)                                                | Perceptions of climate change impacts to human health               |
| 56.       | Carnie et al. (2011)    | Australia     | Empirical Research Article                                                    | Qualitative - Interviews in school-based forums about drought-related mental health experiences | Youth and teachers in rural NSW, Australia                                                         | Mental health outcomes related to drought                           |
| 57.       | Carroll et al. (2010)   | England       | Empirical Research Article                                                    | Qualitative – Interviews and focus groups with people who had been flooded and agency workers   | Flooded residents of Carlisle northwest England and agency workers working with flooded residents. | Health (physical and mental) and social impacts of a flood disaster |
| 58.       | Carroll et al. (2009)   | England       | Empirical Research Article                                                    | Qualitative – phenomenological study                                                            | Flooded residents of Carlisle northwest England and agency workers working with flooded residents. | Health (physical and mental) and social impacts of a flood disaster |
| 59.       | Castleden et al. (2011) | Not specified | Literature Review – Systematic Review with a narrative summary on concepts of | N/A                                                                                             | N/A                                                                                                | N/A                                                                 |

| Article # | Article Citation        | Country        | Literature Type                                                                                                        | Study Design (where applicable) | Participants | Outcomes Measured |
|-----------|-------------------------|----------------|------------------------------------------------------------------------------------------------------------------------|---------------------------------|--------------|-------------------|
|           |                         |                | resilience related to public health                                                                                    |                                 |              |                   |
| 60.       | Chand et al. (2008)     | Global         | Literature Review – Narrative Review of climate change impacts to mental health                                        | N/A                             | N/A          | N/A               |
| 61.       | Cheng, et al. (2013)    | Canada         | Literature Review – Narrative review of the health co-benefits and risks of adaptation strategies to climate change    | N/A                             | N/A          | N/A               |
| 62.       | Cheshire et al. (2015)  | Not Specified  | Literature Review – Narrative review (of community resilience, social capital and governance related to global change) | N/A                             | N/A          | N/A               |
| 63.       | Chowdhury et al. (2011) | Canada         | Literature Review – Narrative Review (of climate change and psychosocial impacts)                                      | N/A                             | N/A          | N/A               |
| 64.       | Cameron et al. (2015)   | Canada Nunavut | Literature Review – Narrative Review (of climate                                                                       | N/A                             | N/A          | N/A               |

| Article # | Article Citation      | Country   | Literature Type                                                                    | Study Design (where applicable)                                                                                   | Participants     | Outcomes Measured                                                          |
|-----------|-----------------------|-----------|------------------------------------------------------------------------------------|-------------------------------------------------------------------------------------------------------------------|------------------|----------------------------------------------------------------------------|
|           |                       |           | change adaptation and resilience in Nunavut, Canada)                               |                                                                                                                   |                  |                                                                            |
| 65.       | Clarke et al. (2012)  | Canada    | Empirical Research Article                                                         | Qualitative -Case study (interviews and case study of climate change and health adaptation frameworks in Ontario) | Health Officials | Utility of climate change adaptation frameworks to address health impacts. |
| 66.       | Clayton et al. (2014) | USA       | Literature Review – Narrative Review of climate change impacts to mental health    | N/A                                                                                                               | N/A              | N/A                                                                        |
| 67.       | Clayton et al. (2017) | USA       | Literature Review – Narrative Review of climate change impacts to mental health    | N/A                                                                                                               | N/A              | N/A                                                                        |
| 68.       | Congues, (2014).      | Australia | Literature Review – Narrative Review of well-being related to Drought in Australia | N/A                                                                                                               | N/A              | N/A                                                                        |
| 69.       | Coombe et al. (2015)  | Australia | Literature Review - Systematic review (of teacher-mediated                         | N/A                                                                                                               | N/A              | N/A                                                                        |

| Article # | Article Citation       | Country              | Literature Type                                                                                                                                                           | Study Design (where applicable)                                                                               | Participants                                | Outcomes Measured                 |
|-----------|------------------------|----------------------|---------------------------------------------------------------------------------------------------------------------------------------------------------------------------|---------------------------------------------------------------------------------------------------------------|---------------------------------------------|-----------------------------------|
|           |                        |                      | interventions to support child mental health post disaster)                                                                                                               |                                                                                                               |                                             |                                   |
| 70.       | Costello et al. (2009) | Global               | Literature Review – Narrative Review (of managing the health effects of climate change)                                                                                   | N/A                                                                                                           | N/A                                         | N/A                               |
| 71.       | Cox et al. (2014)      | Canada               | Empirical Research Article                                                                                                                                                | Qualitative – field testing of rural resilience index (including semi-structured interviews and focus groups) | Rural, remote coastal communities in Canada | Assessment of disaster resilience |
| 72.       | Crabtree (2012)        | Developing Countries | Literature Review – Narrative Review (of epidemiological literature related to the mental health implications of climate change-related flooding in developing countries. | N/A                                                                                                           | N/A                                         | N/A                               |
| 73.       | Crabtree. (2013)       | Developing Countries | Literature Review – Narrative                                                                                                                                             | N/A                                                                                                           | N/A                                         | N/A                               |



| Article # | Article Citation              | Country       | Literature Type                                                                 | Study Design (where applicable)                                                               | Participants                                                                          | Outcomes Measured                              |
|-----------|-------------------------------|---------------|---------------------------------------------------------------------------------|-----------------------------------------------------------------------------------------------|---------------------------------------------------------------------------------------|------------------------------------------------|
|           |                               |               | Review (of psychosocial resilience post-flood)                                  |                                                                                               |                                                                                       |                                                |
| 74.       | Cunsolo Willox et al. (2012)  | Canada        | Empirical Research Article                                                      | Qualitative - Case study of Nunatsiavut (Interview and descriptive analysis of questionnaire) | Residents of Nunatsiavut (72 in-depth interviews, and 112 descriptive questionnaires) | Climate change impacts on a sense of place     |
| 75.       | Cunsolo Willox et al. (2013a) | Canada        | Empirical Research Article                                                      | Qualitative – Case study of Nunatsiavut (interviews)                                          | Residents of Nunatsiavut                                                              | Climate change impacts on health and wellbeing |
| 76.       | Cunsolo Willox et al. (2013b) | Canada        | Empirical Research Article                                                      | Qualitative – Case study of Nunatsiavut (67 in-depth interviews)                              | Community members and local and regional health professionals of Nunatsiavut          | Climate change impacts on mental health        |
| 77.       | Cunsolo Willox et al. (2014)  | Canada        | Empirical Research Article                                                      | Qualitative – Case study of Nunatsiavut                                                       | Community members and local and regional health professionals of Nunatsiavut          | Climate change impacts on mental health        |
| 78.       | Cusack et al. (2011)          | Not specified | Literature Review – Narrative review (of the impact of heatwaves on people with | N/A                                                                                           | N/A                                                                                   | N/A                                            |

| Article # | Article Citation       | Country   | Literature Type                                                                                                                         | Study Design (where applicable)                                                                                                                                                                | Participants                                                                    | Outcomes Measured                               |
|-----------|------------------------|-----------|-----------------------------------------------------------------------------------------------------------------------------------------|------------------------------------------------------------------------------------------------------------------------------------------------------------------------------------------------|---------------------------------------------------------------------------------|-------------------------------------------------|
|           |                        |           | substance abuse and mental health conditions)                                                                                           |                                                                                                                                                                                                |                                                                                 |                                                 |
| 79.       | Cutter et al. (2008)   | USA       | Grey Literature (of research on community resilience related to hazards)                                                                | N/A                                                                                                                                                                                            | N/A                                                                             | N/A                                             |
| 80.       | Davidson et al. (2006) | Global    | Literature Review – Narrative Review (of risks and impacts of disaster, lack of access to care impacts abilities to adapt to disasters) | N/A                                                                                                                                                                                            | N/A                                                                             | N/A                                             |
| 81.       | Dean et al. (2010)     | Australia | Empirical Research Article                                                                                                              | Mixed methods research (focus groups and self-report questionnaire; strengths and difficulties questionnaire and a drought and community survey for children comprised the self-report survey) | Male and female (n =111) adolescents in the Riverina region of New South Wales. | Adolescent mental health experiences of drought |

| Article # | Article Citation       | Country       | Literature Type                                                                                                                                     | Study Design (where applicable) | Participants | Outcomes Measured |
|-----------|------------------------|---------------|-----------------------------------------------------------------------------------------------------------------------------------------------------|---------------------------------|--------------|-------------------|
| 82.       | Dean et al. (2011)     | Not specified | Literature Review – Narrative review (of the relationship between biodiversity and improved mental health in urban environments)                    | N/A                             | N/A          | N/A               |
| 83.       | Deeming et al., (2014) | Europe        | Literature Review – Narrative review (of resilience and adaptation related to hydrometeorological hazards based on 5 case studies across Europe)    | N/A                             | N/A          | N/A               |
| 84.       | Deppisch et al. (2013) | Not specified | Literature Review – Narrative review (of applying social-ecological resilience thinking to transdisciplinary research on climate change adaptation) | N/A                             | N/A          | N/A               |
| 85.       | Dodgen et al. (2016)   | USA           | Literature Review – Narrative review (of the mental health implications)                                                                            | N/A                             | N/A          | N/A               |

| Article # | Article Citation       | Country | Literature Type                                                                                                 | Study Design (where applicable)                                                                            | Participants                                                                        | Outcomes Measured                                                    |
|-----------|------------------------|---------|-----------------------------------------------------------------------------------------------------------------|------------------------------------------------------------------------------------------------------------|-------------------------------------------------------------------------------------|----------------------------------------------------------------------|
|           |                        |         | of climate change in the USA)                                                                                   |                                                                                                            |                                                                                     |                                                                      |
| 86.       | Doherty et al. (2011)  | Global  | Literature Review – Narrative review (of the psychological impacts of climate change)                           | N/A                                                                                                        | N/A                                                                                 | N/A                                                                  |
| 87.       | Dorji (2006)           | Bhutan  | Literature Review – Narrative review (of the psychosocial and mental health implications of disaster in Bhutan) | N/A                                                                                                        | N/A                                                                                 | N/A                                                                  |
| 88.       | Douglas et al. (2012)  | USA     | Empirical Research Article                                                                                      | Qualitative – Case study of two metropolitan Boston, Mass. Communities (workshops with residents)          | Residents of two metropolitan cities in Boston, Mass.                               | Perceived adaptation to climate change                               |
| 89.       | Durkalec et al. (2015) | Canada  | Empirical Research Article                                                                                      | Qualitative -Case study of Inuit community in Nain (participant observation, focus groups, and interviews) | Nain residents; interviews (n= 22), focus groups (n=2), and participant observation | The impact of climate change on a sense of place for Inuit community |

| Article # | Article Citation       | Country       | Literature Type                                                                                                             | Study Design (where applicable)                               | Participants                                                | Outcomes Measured                          |
|-----------|------------------------|---------------|-----------------------------------------------------------------------------------------------------------------------------|---------------------------------------------------------------|-------------------------------------------------------------|--------------------------------------------|
| 90.       | Ebi et al. (2016)      | Not specified | Literature review – Narrative review (of health vulnerabilities related to extreme events)                                  | N/A                                                           | N/A                                                         | N/A                                        |
| 91.       | Edwards et al., (2015) | Australia     | Empirical Research Article                                                                                                  | Quantitative – Survey (rural and regional areas of Australia) | 8,000 residents of rural and regional Australia             | Impact of drought on mental health         |
| 92.       | Edwards et al. (2011). | Not specified | Grey Literature (of climate change, resilience and transformation related to climate change and human health and wellbeing) | N/A                                                           | N/A                                                         | N/A                                        |
| 93.       | Eichler (2015)         | Canada        | Literature Review – Narrative review (of climate change coping for children)                                                | N/A                                                           | N/A                                                         | N/A                                        |
| 94.       | Eisenman et al. (2015) | USA           | Empirical Research Article                                                                                                  | Quantitative – household survey (Kessler Distress Scale)      | Residents of Wallow Fire Arizona (n= 1387 households)       | Psychological distress related to wildfire |
| 95.       | Evans et al. (2016)    | Australia     | Empirical Research Article                                                                                                  | Qualitative - Key informant interviews and                    | Representatives of the fisheries and tourism sectors of the | Psychosocial and structural limits to      |

| Article # | Article Citation           | Country       | Literature Type                                                                                       | Study Design (where applicable)                                                 | Participants              | Outcomes Measured                                                 |
|-----------|----------------------------|---------------|-------------------------------------------------------------------------------------------------------|---------------------------------------------------------------------------------|---------------------------|-------------------------------------------------------------------|
|           |                            |               |                                                                                                       | multi-stakeholder workshops                                                     | Great Barrier Reef region | climate change adaptation                                         |
| 96.       | Every-Palmer et al. (2016) | Australia     | Literature Review – Narrative review (of the role for psychiatry in the field of climate change)      | N/A                                                                             | N/A                       | N/A                                                               |
| 97.       | Fernandez et al. (2015)    | Not specified | Literature Review – Systematic mapping review (of flood impacts to mental health in river catchments) | N/A                                                                             | N/A                       | N/A                                                               |
| 98.       | Few et al. (2004)          | Not specified | Literature Review: Narrative review (of climate related-floods and health)                            | N/A                                                                             | N/A                       | N/A                                                               |
| 99.       | Fleming et al. (2015)      | Australia     | Empirical Research Article                                                                            | Quantitative – Survey (perceptions of how climate change affects wine industry) | 50 Wine Industry Growers  | Stress related to climate change impacts to wine industry growers |
| 100.      | Ford et al. (2012)         | Canada        | Literature Review – Narrative Review (of Indigenous health related to climate change)                 | N/A                                                                             | N/A                       | N/A                                                               |

| Article # | Article Citation             | Country       | Literature Type                                                                                   | Study Design (where applicable)                                              | Participants                                 | Outcomes Measured                                                      |
|-----------|------------------------------|---------------|---------------------------------------------------------------------------------------------------|------------------------------------------------------------------------------|----------------------------------------------|------------------------------------------------------------------------|
| 101.      | Ford et al. (2016)           | Canada        | Empirical Research Article                                                                        | Qualitative – Workshops on community-based adaptation approaches to research | Sample of Inuit residents in Canadian Arctic | Role of community-based adaptation research in climate change research |
| 102.      | Fresque-Baxter et al. (2012) | Not specified | Literature Review – Narrative review (of place and identify related to climate change adaptation) | N/A                                                                          | N/A                                          | N/A                                                                    |
| 103.      | Friel et al. (2014)          | Australia     | Empirical Research Article                                                                        | Quantitative – Survey (population-based survey)                              | Sample of Australian adults                  | Perceived impact of drought on food security and mental health         |
| 104.      | Fritze et al. (2008)         | Global        | Literature Review – Narrative review (climate change and mental health)                           | N/A                                                                          | N/A                                          | N/A                                                                    |
| 105.      | Fundter et al. (2008)        | Netherlands   | Literature Review – Narrative review (of health impacts related to large-scale floods)            | N/A                                                                          | N/A                                          | N/A                                                                    |
| 106.      | Furgal et al. (2008)         | Canada        | Literature Review – Narrative review (health impacts of climate change in Canada's north)         | N/A                                                                          | N/A                                          | N/A                                                                    |

| Article # | Article Citation     | Country              | Literature Type                                                                                              | Study Design (where applicable)                                                                                   | Participants                     | Outcomes Measured                                             |
|-----------|----------------------|----------------------|--------------------------------------------------------------------------------------------------------------|-------------------------------------------------------------------------------------------------------------------|----------------------------------|---------------------------------------------------------------|
| 107.      | Füssel et al. (2007) | Not specified        | Literature Review – Narrative review (of vulnerability related to climate change research)                   | N/A                                                                                                               | N/A                              | N/A                                                           |
| 108.      | Galea et al. (2007)  | USA                  | Empirical Research Article                                                                                   | Quantitative (survey)                                                                                             | Hurricane Katrina survivors      | Hurricane-related stressors and mental health                 |
| 109.      | Gibbs et al. (2013)  | Australia            | Empirical Research Article                                                                                   | Mixed Methods (longitudinal study of 2009 Victorian bushfires in Australia via surveys, interviews, focus groups) | Adults and children (over age 5) | Mental health, wellbeing and social impacts of 2009 wildfires |
| 110.      | Gifford (2011)       | Not specified        | Literature Review – Narrative review (of psychological barriers to climate change mitigation and adaptation) | N/A                                                                                                               | N/A                              | N/A                                                           |
| 111.      | Goh et al. (2012)    | Developing countries | Literature Review – Narrative review (climate change impacts on gender in developing countries)              | N/A                                                                                                               | N/A                              | N/A                                                           |
| 112.      | Gray (2008)          | Not Specified        | Grey Literature (commentary long-                                                                            | N/A                                                                                                               | N/A                              | N/A                                                           |



| Article # | Article Citation     | Country   | Literature Type                                                                                                                                                  | Study Design (where applicable)                                                                   | Participants                                                | Outcomes Measured                                                    |
|-----------|----------------------|-----------|------------------------------------------------------------------------------------------------------------------------------------------------------------------|---------------------------------------------------------------------------------------------------|-------------------------------------------------------------|----------------------------------------------------------------------|
|           |                      |           | term health impacts of flooding)                                                                                                                                 |                                                                                                   |                                                             |                                                                      |
| 113.      | Green et al. (2014)  | Australia | Literature Review – Narrative Review (climate change impacts on the health and wellbeing on Indigenous peoples in remote Australian communities)                 | N/A                                                                                               | N/A                                                         | N/A                                                                  |
| 114.      | Green et al. (2012)  | Australia | Literature Review – Narrative review (of theory and practice related to climate change vulnerability assessments for remote indigenous communities in Australia) | N/A                                                                                               | N/A                                                         | N/A                                                                  |
| 115.      | Greene et al. (2015) | England   | Empirical Research Article                                                                                                                                       | Quantitative – Survey (use of Bayesian structure equation modelling to measure latent resilience) | 2238 flood affected residents living in Southern in England | Resilience, vulnerability and psychological harm related to flooding |

| Article # | Article Citation        | Country       | Literature Type                                                                 | Study Design (where applicable)                                                                                                                                         | Participants                                     | Outcomes Measured                                        |
|-----------|-------------------------|---------------|---------------------------------------------------------------------------------|-------------------------------------------------------------------------------------------------------------------------------------------------------------------------|--------------------------------------------------|----------------------------------------------------------|
| 116.      | Greene (2014).          | Not Specified | Literature Review – Narrative Review (of resilience and ecological systems)     | N/A                                                                                                                                                                     | N/A                                              | N/A                                                      |
| 117.      | Gruebner et al. (2015)  | USA           | Empirical Research Article                                                      | Quantitative – Telephone survey (using e Posttraumatic Stress Checklist for DSM-5 (PCL-5) and the nine-item Patient Health Questionnaire (PHQ-9) to measure depression) | 418 Adults affected by Hurricane Sandy           | PTSD and Depression of people exposed to Hurricane Sandy |
| 118.      | Gunn et al. (2012)      | Australia     | Empirical Research Article                                                      | Quantitative – Survey (Kessler Psychological Distress Scale)                                                                                                            | 309 Drought-affected southern Australian farmers | Stress and coping of farmers related to drought          |
| 119.      | Gutierrez et al. (2016) | USA           | Literature Review – Narrative review (climate justice in rural, southeast, USA) | N/A                                                                                                                                                                     | N/A                                              | N/A                                                      |

| Article # | Article Citation       | Country   | Literature Type                                                                         | Study Design (where applicable)                                                                                                                                 | Participants                                                                                                              | Outcomes Measured                    |
|-----------|------------------------|-----------|-----------------------------------------------------------------------------------------|-----------------------------------------------------------------------------------------------------------------------------------------------------------------|---------------------------------------------------------------------------------------------------------------------------|--------------------------------------|
| 120.      | Hanigan et al. (2012)  | Australia | Empirical Research Article                                                              | Quantitative – Review of data between 1907-2007 on suicides (using generalized additive model that controlled for season, region, and long-term suicide trends) | Suicide data in Australia from 1907-2007                                                                                  | Suicides related to drought          |
| 121.      | Hannigan et al. (2011) | UK        | Literature Review – Theoretical Review (of policies related to mental health in the UK) | N/A                                                                                                                                                             | N/A                                                                                                                       | N/A                                  |
| 122.      | Harper et al. (2015)   | Canada    | Empirical Research Article                                                              | Mixed Methods – in-depth interviews, and photovoice workshops                                                                                                   | Regional health representatives in Nunatsiavut (11 interviews; 3 photovoice workshops (with 11 Rigolet community members) | Climate-sensitive health priorities. |
| 123.      | Hart et al. (2011)     | Australia | Literature Review – Narrative Review (of drought related                                | N/A                                                                                                                                                             | N/A                                                                                                                       | N/A                                  |

| Article # | Article Citation        | Country             | Literature Type                                                                                              | Study Design (where applicable) | Participants | Outcomes Measured |
|-----------|-------------------------|---------------------|--------------------------------------------------------------------------------------------------------------|---------------------------------|--------------|-------------------|
|           |                         |                     | mental health in New South Wales)                                                                            |                                 |              |                   |
| 124.      | Henderson et al. (2015) | Not Specified       | Literature Review – Narrative Review (climate change and mental disorders)                                   | N/A                             | N/A          | N/A               |
| 125.      | Höfler (2014).          | Not Specified       | Literature Review – Narrative Review (of psychosocial resilience in adults related to disasters)             | N/A                             | N/A          | N/A               |
| 126.      | Holmes (2015)           | Trinidad and Tobago | Literature Review – Narrative Review (of risk and resilience related to climate hazards and extreme weather) | N/A                             | N/A          | N/A               |
| 127.      | Holmgren (2012)         | Not Specified       | Grey Literature (of adapting to climate change and peak oil)                                                 | N/A                             | N/A          | N/A               |
| 128.      | Hunter (2009).          | Australia           | Literature Review – Narrative Review (of effects of climate change on mental health of                       | N/A                             | N/A          | N/A               |

| Article # | Article Citation        | Country   | Literature Type                                                                       | Study Design (where applicable)                                                                                                                                                                    | Participants                             | Outcomes Measured                         |
|-----------|-------------------------|-----------|---------------------------------------------------------------------------------------|----------------------------------------------------------------------------------------------------------------------------------------------------------------------------------------------------|------------------------------------------|-------------------------------------------|
|           |                         |           | Indigenous peoples in northern Australia)                                             |                                                                                                                                                                                                    |                                          |                                           |
| 129.      | Hutton (2005)           | Canada    | Literature Review – Narrative Review (Psychosocial consequences of climate change)    | N/A                                                                                                                                                                                                | N/A                                      | N/A                                       |
| 130.      | Imperiale et al. (2016) | Italy     | Literature Review – Narrative Review (community resilience post-disaster in L’Aquila) | N/A                                                                                                                                                                                                | N/A                                      | N/A                                       |
| 131.      | Inder et al. (2011)     | Australia | Empirical Research Article                                                            | Quantitative – Cohort case study using surveys (Household, Income and Labour Dynamics in Australia Survey; Australian Rural Mental Health Study; Hunter Community Study; and Extending Treatments, | Rural and remote population in Australia | Climate related mental health adversities |

| Article # | Article Citation          | Country       | Literature Type                                                                                                                                                | Study Design<br>(where applicable)          | Participants | Outcomes Measured |
|-----------|---------------------------|---------------|----------------------------------------------------------------------------------------------------------------------------------------------------------------|---------------------------------------------|--------------|-------------------|
|           |                           |               |                                                                                                                                                                | Education and Networks in Depression study) |              |                   |
| 132.      | Jain, (2015)              | Global        | Other – Commentary addressing questions about doing mental health justice in the SDG)                                                                          | N/A                                         | N/A          | N/A               |
| 133.      | Jane-Llopis et al. (2011) | Not Specified | Literature Review – Narrative Review (addressing the burden of mental health)                                                                                  | N/A                                         | N/A          | N/A               |
| 134.      | Jaspal et al. (2014)      | Not Specified | Literature Review – Theoretical Review (Using social representation theory and identity process theory trying to understand human responses to climate change) | N/A                                         | N/A          | N/A               |
| 135.      | Jenkins et al. (2011)     | Global        | Literature Review – Narrative                                                                                                                                  | N/A                                         | N/A          | N/A               |

| Article # | Article Citation     | Country   | Literature Type                                                                                         | Study Design (where applicable)                                         | Participants         | Outcomes Measured             |
|-----------|----------------------|-----------|---------------------------------------------------------------------------------------------------------|-------------------------------------------------------------------------|----------------------|-------------------------------|
|           |                      |           | Review (mental health and global development)                                                           |                                                                         |                      |                               |
| 136.      | Joerin et al, (2014) | Global    | Literature Review -Theoretical Review (concept of resilience related to disasters)                      | N/A                                                                     | N/A                  | N/A                           |
| 137.      | Jones et al. (2012)  | Australia | Empirical Research Article                                                                              | Mixed Methods Research – interview and self-report survey of behaviours | 50 Patients with OCD | OCD related to climate change |
| 138.      | Keim (2008)          | Global    | Literature Review – Narrative review (of public health’s role in climate change adaptation)             | N/A                                                                     | N/A                  | N/A                           |
| 139.      | Keim (2011)          | Global    | Literature Review – Narrative Review (public health’s role in reducing vulnerability to climate change) | N/A                                                                     | N/A                  | N/A                           |
| 140.      | Keller (2013)        | France    | Literature Review – Narrative Review (Paris Heatwave)                                                   | N/A                                                                     | N/A                  | N/A                           |

| Article # | Article Citation         | Country       | Literature Type                                                                                                                                 | Study Design (where applicable)                               | Participants                                    | Outcomes Measured              |
|-----------|--------------------------|---------------|-------------------------------------------------------------------------------------------------------------------------------------------------|---------------------------------------------------------------|-------------------------------------------------|--------------------------------|
| 141.      | Kessler (2008)           | USA           | Empirical Research Article                                                                                                                      | Quantitative – Surveys (TSQ for mood and PTSD, and Kessler 6) | 815 residents who experienced Hurricane Katrina | Mental illness and suicidality |
| 142.      | Kirmayer et al. (2011)   | Canada        | Literature Review – Narrative Review (of resilience constructs from the perspectives of indigenous peoples - Inuit, Métis, Mi'kmaq, and Mohawk) | N/A                                                           | N/A                                             | N/A                            |
| 143.      | Kjellstrom et al. (2013) | Global        | Literature Review – Narrative Review (of non-communicable health risks of climate change to health and wellbeing)                               | N/A                                                           | N/A                                             | N/A                            |
| 144.      | Koger et al. (2011)      | Not Specified | Literature Review – Narrative Review (psychological solutions and strategies to address climate change)                                         | N/A                                                           | N/A                                             | N/A                            |



| Article # | Article Citation  | Country       | Literature Type                                                                                  | Study Design (where applicable)                           | Participants                                                           | Outcomes Measured                                              |
|-----------|-------------------|---------------|--------------------------------------------------------------------------------------------------|-----------------------------------------------------------|------------------------------------------------------------------------|----------------------------------------------------------------|
| 145.      | Kuehne (2014)     | Australia     | Empirical Research Article                                                                       | Qualitative – Interviews                                  | Key informants irrigators from the South Australian Riverland (n = 11) | Farmers perceptions of climate change and adaptation responses |
| 146.      | Kukarenko, (2011) | Arctic Region | Literature Review – Narrative Review (of human health, gender, and climate change in the Arctic) | N/A                                                       | N/A                                                                    | N/A                                                            |
| 147.      | LaLone (2012)     | USA           | Empirical Research Article                                                                       | Qualitative - Ethnographic case study of rural Appalachia | Sample of people who experienced tornados in rural Appalachia          | Social capital mobilization post-disaster                      |
| 148.      | Lamond (2014)     | Not Specified | Literature Review – Narrative Review (of impact of repeat flooding on mental health)             | N/A                                                       | N/A                                                                    | N/A                                                            |
| 149.      | Lang (2015)       | Not Specified | Grey Literature (of climate change and mental health)                                            | N/A                                                       | N/A                                                                    | N/A                                                            |
| 150.      | Leff (2008)       | Not Specified | Literature Review – Narrative Review (climate change and psychiatry)                             | N/A                                                       | N/A                                                                    | N/A                                                            |

| Article # | Article Citation      | Country       | Literature Type                                                                       | Study Design (where applicable) | Participants                               | Outcomes Measured                 |
|-----------|-----------------------|---------------|---------------------------------------------------------------------------------------|---------------------------------|--------------------------------------------|-----------------------------------|
| 151.      | Leslie et al (2013)   | East Africa   | Empirical Research Article                                                            | Qualitative Study – Case Study  | Sample of pastoral East African Population | Responses to environmental change |
| 152.      | Levine et al. (2011)  | Africa        | Literature Review – Narrative Review (adaptive capacity and climate change in Africa) | N/A                             | N/A                                        | N/A                               |
| 153.      | Levy et al. (2015)    | Global        | Literature Review – Narrative Review (climate change social justice and human rights) | N/A                             | N/A                                        | N/A                               |
| 154.      | Lindahl et al. (2013) | Not Specified | Grey Literature (mental health, health equity, and social sustainability)             | N/A                             | N/A                                        | N/A                               |
| 155.      | Loboda (2014)         | Arctic        | Literature Review – Narrative Review (adaptation and climate change in the Arctic)    | N/A                             | N/A                                        | N/A                               |
| 156.      | Lorenz et al. (2016)  | Not Specified | Literature Review – Narrative Review (of                                              | N/A                             | N/A                                        | N/A                               |

| Article # | Article Citation        | Country               | Literature Type                                                                         | Study Design (where applicable)   | Participants                                                                         | Outcomes Measured                                               |
|-----------|-------------------------|-----------------------|-----------------------------------------------------------------------------------------|-----------------------------------|--------------------------------------------------------------------------------------|-----------------------------------------------------------------|
|           |                         |                       | resilience in disasters)                                                                |                                   |                                                                                      |                                                                 |
| 157.      | Lowe et al. (2013)      | OECD Member countries | Literature Review – Systematic Review (of health vulnerabilities – related to floods)   | N/A                               | N/A                                                                                  | N/A                                                             |
| 158.      | Luber et al. (2015)     | Global                | Grey Literature Review (climate change and human health)                                | N/A                               | N/A                                                                                  | N/A                                                             |
| 159.      | MacDonald et al. (2015) | Canada                | Empirical Research Article                                                              | Qualitative – In-depth interviews | Youth aged 15–25 from five communities of the Nunatsiavut region of Labrador, Canada | Protective factors that support wellbeing in a changing climate |
| 160.      | Manyena (2014)          | Zimbabwe              | Empirical Research Article                                                              | Qualitative – Case study          | Zimbabwe                                                                             | Discourse and narratives of disaster resilience                 |
| 161.      | Marinucci et al. (2014) | USA                   | Literature Review – Narrative Review (or resilience in public health to climate change) | N/A                               | N/A                                                                                  | N/A                                                             |
| 162.      | McFarlane et al. (2012) | Not Specified         | Literature Review – Narrative Review (of mental                                         | N/A                               | N/A                                                                                  | N/A                                                             |

| Article # | Article Citation             | Country                       | Literature Type                                                                               | Study Design (where applicable)          | Participants                                                         | Outcomes Measured                       |
|-----------|------------------------------|-------------------------------|-----------------------------------------------------------------------------------------------|------------------------------------------|----------------------------------------------------------------------|-----------------------------------------|
|           |                              |                               | health services post-disaster)                                                                |                                          |                                                                      |                                         |
| 163.      | Miles et al. (2011)          | Not Specified                 | Literature Review – Theoretical Review (Resilience and disaster modelling)                    | N/A                                      | N/A                                                                  | N/A                                     |
| 164.      | Molnar (2010)                | Global (focus on rural areas) | Literature Review – Narrative Review (of societal responses to climate change in rural areas) | N/A                                      | N/A                                                                  | N/A                                     |
| 165.      | Motesharriet al. (2016)      | Global                        | Literature Review – Narrative Review (of sustainability modelling – human and earth systems)  | N/A                                      | N/A                                                                  | N/A                                     |
| 166.      | Morello-Frosch et al. (2011) | USA                           | Empirical Research Article                                                                    | Qualitative – Observation and interviews | Three community and advocacy-based rebuilding and organizing project | Resilience related to Hurricane Katrina |
| 167.      | Morrissey et al. (2007)      | Australia                     | Literature Review – Narrative Review (disaster, climate change, and mental health)            | N/A                                      | N/A                                                                  | N/A                                     |

| Article # | Article Citation    | Country       | Literature Type                                                                                                           | Study Design (where applicable)                                                                                                                                                                                                  | Participants      | Outcomes Measured                  |
|-----------|---------------------|---------------|---------------------------------------------------------------------------------------------------------------------------|----------------------------------------------------------------------------------------------------------------------------------------------------------------------------------------------------------------------------------|-------------------|------------------------------------|
| 168.      | Morss et al. (2011) | Not Specified | Literature Review – Narrative review (climate change and societal outcomes)                                               | N/A                                                                                                                                                                                                                              | N/A               | N/A                                |
| 169.      | Moser (2013)        | Not Specified | Literature Review – Narrative Review (adaptation related to climate change – focus on emotional and political adaptation) | N/A                                                                                                                                                                                                                              | N/A               | N/A                                |
| 170.      | Munro et al. (2017) | England       | Empirical Research Article                                                                                                | Quantitative – Survey (Measuring depression PHQ-2; anxiety using Generalised Anxiety Disorder [GAD]-2 anxiety scale, and post-traumatic stress disorder, measured by the Post-Traumatic Stress Disorder Checklist [PCL]-6 scale) | Flooded residents | Mental health outcomes of flooding |

| Article # | Article Citation     | Country       | Literature Type                                                                       | Study Design (where applicable) | Participants | Outcomes Measured |
|-----------|----------------------|---------------|---------------------------------------------------------------------------------------|---------------------------------|--------------|-------------------|
| 171.      | Myers et al. (2011)  | Global        | Literature Review – Narrative Review (of indirect effects of climate change)          | N/A                             | N/A          | N/A               |
| 172.      | Myers et al. (2012)  | Global        | Literature Review – Narrative Review (public health, emotions and climate change)     | N/A                             | N/A          | N/A               |
| 173.      | Nahar et al. (2014)  | Bangladesh    | Literature Review – Narrative Review (mental health care post-disaster in Bangladesh) | N/A                             | N/A          | N/A               |
| 174.      | Neria et al. (2009)  | Not Specified | Grey Literature (Mental health and disasters)                                         | N/A                             | N/A          | N/A               |
| 175.      | Neria et al. (2012). | USA           | Literature Review – Narrative Review (Mental Health effects of Hurricane Sandy)       | N/A                             | N/A          | N/A               |
| 176.      | North et al. (2013)  | Global        | Literature Review – Narrative review (mental health and community disaster response)  | N/A                             | N/A          | N/A               |

| Article # | Article Citation        | Country       | Literature Type                                                                  | Study Design (where applicable)                                   | Participants                                                                  | Outcomes Measured                      |
|-----------|-------------------------|---------------|----------------------------------------------------------------------------------|-------------------------------------------------------------------|-------------------------------------------------------------------------------|----------------------------------------|
| 177.      | Nurse et al. (2010)     | Global        | Literature Review – Narrative Review (climate change and mental health response) | N/A                                                               | N/A                                                                           | N/A                                    |
| 178.      | Oba et al. (2010)       | Thailand      | Empirical Research Article                                                       | Qualitative – Focus groups                                        | People who experienced the flood, health professionals, and health volunteers | Perceptions of psychological wellbeing |
| 179.      | O'Brien et al. (2010)   | Global        | Literature Review – Narrative Review (of climate, security, and ethics)          | N/A                                                               | N/A                                                                           | N/A                                    |
| 180.      | Obrien et al. (2014)    | Australia     | Empirical Research Article                                                       | Quantitative - longitudinal review of rainfall records and survey | Sample of drought-affected rural and urban dwellers                           | Mental health related to drought       |
| 181.      | O'Donnell et al. (2016) | Global        | Literature Review – Narrative Review (disasters, mental health, older adults)    | N/A                                                               | N/A                                                                           | N/A                                    |
| 182.      | Ojala (2012)            | Sweden        | Empirical Research Article                                                       | Quantitative – Survey                                             | Swedish Children (n=293)                                                      | Coping with climate change             |
| 183.      | Ojala (2013)            | Swedish       | Empirical Research Article                                                       | Quantitative – Survey                                             | Swedish adolescents (n=321)                                                   | Coping with climate change             |
| 184.      | Ojala (2016)            | Not Specified | Literature Review – Narrative review                                             | N/A                                                               | N/A                                                                           | N/A                                    |

| Article # | Article Citation          | Country       | Literature Type                                                                                 | Study Design (where applicable) | Participants                | Outcomes Measured                                               |
|-----------|---------------------------|---------------|-------------------------------------------------------------------------------------------------|---------------------------------|-----------------------------|-----------------------------------------------------------------|
|           |                           |               | (children, emotions, climate change)                                                            |                                 |                             |                                                                 |
| 185.      | Opara (2014).             | Nigeria       | Grey Literature (Climate change in Nigeria)                                                     | N/A                             | N/A                         | N/A                                                             |
| 186.      | Ortega-Egea et al. (2014) | Europe        | Empirical Research Article                                                                      | Quantitative - Survey           | Sample of European citizens | Psychosocial correlates of climate change mitigation behaviours |
| 187.      | Ostry et al. (2010)       | Canada        | Empirical Research Article                                                                      | Qualitative – Case study        | Communities in BC           | Climate Change and health impacts                               |
| 188.      | Padhy et al. (2015)       | Not Specified | Literature Review – Narrative Review (of mental health effects of climate change)               | N/A                             | N/A                         | N/A                                                             |
| 189.      | Page et al. (2010)        | Global        | Literature Review – Narrative Review (of climate change and mental health)                      | N/A                             | N/A                         | N/A                                                             |
| 190.      | Parlee et al. (2012)      | Canada        | Literature Review – Narrative Review (well-being related to environmental change in the Arctic) | N/A                             | N/A                         | N/A                                                             |



| Article # | Article Citation       | Country       | Literature Type                                                              | Study Design (where applicable)                                     | Participants                                                                                                                                                                                     | Outcomes Measured                                           |
|-----------|------------------------|---------------|------------------------------------------------------------------------------|---------------------------------------------------------------------|--------------------------------------------------------------------------------------------------------------------------------------------------------------------------------------------------|-------------------------------------------------------------|
| 191.      | Parsons et al. (2016)  | Global        | Literature Review – Narrative Review (disaster resilience)                   | N/A                                                                 | N/A                                                                                                                                                                                              | N/A                                                         |
| 192.      | Petrasek et al (2013)  | Canada        | Empirical Research Article                                                   | Qualitative – Interviews                                            | (12–25 years old) in the Inuit community of Rigolet, Nunatsiavut, Canada (n= 20)                                                                                                                 | Observations and perceptions of climate change              |
| 193.      | Phua (2015)            | International | Literature Review – Narrative Review (healthcare systems and climate change) | N/A                                                                 | N/A                                                                                                                                                                                              | N/A                                                         |
| 194.      | Polain et al. (2011)   | Australia     | Empirical Research Article                                                   | Mixed Methods – Semi-structured content forums and content analysis | One hundred and fifty older farmers, their families, Industry and Investment NSW, rural financial and mental health services, the Country Women's Association and other non-government agencies. | Perceptions of mental health consequences of climate change |
| 195.      | Popovski et al. (2012) | Not Specified | Literature Review – Narrative Review (climate change victims)                | N/A                                                                 | N/A                                                                                                                                                                                              | N/A                                                         |

| Article # | Article Citation          | Country              | Literature Type                                                                                 | Study Design (where applicable)                                                                                                            | Participants                                                                                           | Outcomes Measured                |
|-----------|---------------------------|----------------------|-------------------------------------------------------------------------------------------------|--------------------------------------------------------------------------------------------------------------------------------------------|--------------------------------------------------------------------------------------------------------|----------------------------------|
| 196.      | Powers et al. (2015)      | Australia            | Empirical Research Article                                                                      | Quantitative – Survey (longitudinal, women’s health; surveys included the Mental Health Index of the Medical Outcomes Study Short-Form 36) | 6,664 women in Australia (between 1996, 1998, 2001, 2004 and 2008) who were born between 1946 and 1951 | Mental health effects of drought |
| 197.      | Rahman et al. (2014)      | Global               | Literature Review – Narrative Review (of youth perceptions of climate change impacts to health) | N/A                                                                                                                                        | N/A                                                                                                    | N/A                              |
| 198.      | Pfefferbaum et al. (2011) | USA                  | Grey Literature (community resilience to disaster toolkit)                                      | N/A                                                                                                                                        | N/A                                                                                                    | N/A                              |
| 199.      | Ramsay et al. (2011)      | Global               | Grey Literature (PTG, resilience, spirituality related to climate change)                       | N/A                                                                                                                                        | N/A                                                                                                    | N/A                              |
| 200.      | Rataj et al. (2016)       | Developing Countries | Literature Review – Systematic Review (extreme weather and mental health disorders)             | N/A                                                                                                                                        | N/A                                                                                                    | N/A                              |

| Article # | Article Citation      | Country       | Literature Type                                                                                 | Study Design (where applicable) | Participants                                                | Outcomes Measured                                             |
|-----------|-----------------------|---------------|-------------------------------------------------------------------------------------------------|---------------------------------|-------------------------------------------------------------|---------------------------------------------------------------|
| 201.      | Reser et al. (2012)   | Not Specified | Literature Review – Narrative Review (coping with climate change)                               | N/A                             | N/A                                                         | N/A                                                           |
| 202.      | Reser et al. (2011a)  | Not Specified | Literature Review – Narrative Review (psychological responses and adaptation to climate change) | N/A                             | N/A                                                         | N/A                                                           |
| 203.      | Reser et al. (2011b). | Not Specified | Literature Review – Narrative Review (adaptation and coping with climate change)                | N/A                             | N/A                                                         | N/A                                                           |
| 204.      | Rice et al. (2016)    | Asia pacific  | Literature Review – Narrative review (climate change and mental health)                         | N/A                             | N/A                                                         | N/A                                                           |
| 205.      | Riemer et al. (2011)  | Global        | Literature Review – Narrative Review (climate change and psychology)                            | N/A                             | N/A                                                         | N/A                                                           |
| 206.      | Rigby et al. (2011).  | Australia     | Empirical Research Article                                                                      | Mixed Methods Research (content | Aboriginal people, service providers and other stakeholders | Perceived impact of drought on social and emotional wellbeing |

| Article # | Article Citation               | Country       | Literature Type                                                                                            | Study Design<br>(where applicable)   | Participants | Outcomes Measured |
|-----------|--------------------------------|---------------|------------------------------------------------------------------------------------------------------------|--------------------------------------|--------------|-------------------|
|           |                                |               |                                                                                                            | analysis and semi-structured forums) |              |                   |
| 207.      | Rodriguez-Llanes et al. (2013) | Not Specified | Literature Review – Narrative Review (measuring psychological resilience to disasters)                     | N/A                                  | N/A          | N/A               |
| 208.      | Roeser (2012)                  | Not Specified | Literature Review – Narrative Review (communication and engagement related to climate change and emotions) | N/A                                  | N/A          | N/A               |
| 209.      | Roufeil et al. (2014)          | Australia     | Literature Review – Narrative Review (health challenges in rural Australian communities)                   | N/A                                  | N/A          | N/A               |
| 210.      | Rudolph, et al. (2015)         | Global        | Literature Review (Narrative Review – climate change and health inequities)                                | N/A                                  | N/A          | N/A               |
| 211.      | Rufat et al. (2015)            | Global        | Literature Review (Narrative Review                                                                        | N/A                                  | N/A          | N/A               |

| Article # | Article Citation          | Country       | Literature Type                                                                           | Study Design (where applicable)                                                                                | Participants                                                                                                | Outcomes Measured                                                         |
|-----------|---------------------------|---------------|-------------------------------------------------------------------------------------------|----------------------------------------------------------------------------------------------------------------|-------------------------------------------------------------------------------------------------------------|---------------------------------------------------------------------------|
|           |                           |               | of case studies–<br>social vulnerability<br>and floods)                                   |                                                                                                                |                                                                                                             |                                                                           |
| 212.      | Sahni et al.<br>(2016)    | Canada        | Empirical<br>Research Article                                                             | Quantitative –<br>Public health<br>surveillance<br>(emergency<br>department visits,<br>administrative<br>data) | People who<br>experienced the 2013<br>flood                                                                 | Health events<br>(including mental<br>health)                             |
| 213.      | Saniotis et al.<br>(2010) | Australia     | Literature Review<br>– Narrative<br>Review (climate<br>change impacts on<br>older adults) | N/A                                                                                                            | N/A                                                                                                         | N/A                                                                       |
| 214.      | Sapiains et al.<br>(2016) | Not Specified | Empirical<br>Research Article                                                             | Qualitative                                                                                                    | People who thought<br>climate change is<br>natural and those who<br>thought it is human-<br>induced (N=156) | Individual responses<br>to climate change                                 |
| 215.      | Satcher et al.<br>(2007)  | USA           | Literature Review<br>– Narrative<br>Review (of<br>disasters and<br>mental health)         | N/A                                                                                                            | N/A                                                                                                         | N/A                                                                       |
| 216.      | Schmeltz et al.<br>(2013) | USA           | Empirical<br>Research Article                                                             | Qualitative -field<br>report from<br>Hurricane Sandy                                                           | Street canvasses,<br>governmental reports,<br>community flyers,<br>and meeting                              | Accounts of the<br>effects of Sandy and<br>the response to daily<br>needs |

| Article # | Article Citation      | Country       | Literature Type                                                                             | Study Design (where applicable) | Participants                                                                                                                          | Outcomes Measured |
|-----------|-----------------------|---------------|---------------------------------------------------------------------------------------------|---------------------------------|---------------------------------------------------------------------------------------------------------------------------------------|-------------------|
|           |                       |               |                                                                                             |                                 | transcripts, as well as firsthand observations by a local nonprofit Red Hook Initiative (RHI) and community members, and social media |                   |
| 217.      | Schrader et al (2013) | Not Specified | Other – commentary (mental health researchers learning from climate change debate)          | N/A                             | N/A                                                                                                                                   | N/A               |
| 218.      | Schulte et al. (2016) | Not Specified | Literature Review – Narrative Review (climate change and occupational health)               | N/A                             | N/A                                                                                                                                   | N/A               |
| 219.      | Schulte et al. (2009) | Not Specified | Literature Review – Narrative Review and framework (climate change and occupational health) | N/A                             | N/A                                                                                                                                   | N/A               |
| 220.      | Shultz et al. (2017)  | USA           | Other – Commentary                                                                          | N/A                             | N/A                                                                                                                                   | N/A               |

| Article # | Article Citation      | Country       | Literature Type                                                                | Study Design (where applicable)                          | Participants                                                                                                  | Outcomes Measured                                 |
|-----------|-----------------------|---------------|--------------------------------------------------------------------------------|----------------------------------------------------------|---------------------------------------------------------------------------------------------------------------|---------------------------------------------------|
|           |                       |               | (health consequences of Hurricane Karvey)                                      |                                                          |                                                                                                               |                                                   |
| 221.      | Searle et al. (2009)  | Not Specified | Literature Review – Narrative Review (psychological impacts of climate change) | N/A                                                      | N/A                                                                                                           | N/A                                               |
| 222.      | Searle et al. (2010)  | Australia     | Empirical Research Article                                                     | Quantitative – Survey (Cross-sectional)                  | Sample of adults in Australia (N= 275)                                                                        | Perceptions of distress related to climate change |
| 223.      | Selvey et al. (2015)  | Not Specified | Literature Review – Narrative Review (health and climate change)               | N/A                                                      | N/A                                                                                                           | N/A                                               |
| 224.      | Shaw et al. (2009)    | Canada        | Empirical Research Article                                                     | Qualitative – Participatory capacity building approach   | Community of Delta                                                                                            | Climate change scenarios for capacity building    |
| 225.      | Shaw et al. (2014)    | UK            | Empirical Research Article                                                     | Mixed Methods – Case study (interview, discourse review) | Residents of flood prone area; health service providers (interviews), community facilities (discourse review) | Social vulnerability and social resilience        |
| 226.      | Sharifi et al. (2016) | Not Specified | Literature Review – Narrative                                                  | N/A                                                      | N/A                                                                                                           | N/A                                               |

| Article # | Article Citation           | Country       | Literature Type                                                                            | Study Design (where applicable) | Participants                      | Outcomes Measured                                                  |
|-----------|----------------------------|---------------|--------------------------------------------------------------------------------------------|---------------------------------|-----------------------------------|--------------------------------------------------------------------|
|           |                            |               | Review (of community resilience assessment tools)                                          |                                 |                                   |                                                                    |
| 227.      | Shukla. (2013)             | Global        | Literature Review – Narrative Review (extreme weather and mental health)                   | N/A                             | N/A                               | N/A                                                                |
| 228.      | Silove et al. (2006)       | Not Specified | Literature Review – Narrative Review (community psychosocial needs post-disaster)          | N/A                             | N/A                               | N/A                                                                |
| 229.      | Smoyer-Tomic et al. (2004) | Canada        | Literature Review – Narrative Review (health consequences of drought in Canadian prairies) | N/A                             | N/A                               | N/A                                                                |
| 230.      | Simpson et al. (2011)      | Global        | Literature Review – Narrative Review (mental health, wellbeing, climate change)            | N/A                             | N/A                               | N/A                                                                |
| 231.      | Spence et al. (2012)       | USA           | Empirical Research Article                                                                 | Quantitative - Survey           | Sample of American public (n=653) | Perceptions about the psychological implications of climate change |



| Article # | Article Citation         | Country       | Literature Type                                                                                                | Study Design (where applicable)                                                           | Participants                                                                                    | Outcomes Measured                           |
|-----------|--------------------------|---------------|----------------------------------------------------------------------------------------------------------------|-------------------------------------------------------------------------------------------|-------------------------------------------------------------------------------------------------|---------------------------------------------|
| 232.      | Stain et al. (2011)      | Australia     | Empirical Research Article                                                                                     | Quantitative – Survey (Kessler 10 distress scale)                                         | Adults in rural areas exposed to chronic drought (n= 302)                                       | Psychological impact of chronic drought     |
| 233.      | Stanke et al. (2012)     | UK            | Literature Review – Narrative Review (mental health consequences of prolonged drought)                         | N/A                                                                                       | N/A                                                                                             | N/A                                         |
| 234.      | Stedman (2004)           | Canada        | Empirical Research Article                                                                                     | Quantitative - Survey                                                                     | Policy actors in Canada (n=851)                                                                 | Perceptions of climate change risks         |
| 235.      | Stephenson et al. (2014) | Not Specified | Literature Review – Narrative Review (long-term health impacts of flood)                                       | N/A                                                                                       | N/A                                                                                             | N/A                                         |
| 236.      | Stuart et al. (2011)     | New Zealand   | Literature Review – Narrative Review (of health education and response to vulnerable people during heat waves) | N/A                                                                                       | N/A                                                                                             | N/A                                         |
| 237.      | Sung et al. (2011)       | Taiwan        | Empirical Research Article                                                                                     | Quantitative - In patient data interpolated with meteorological data (longitudinal study) | Psychiatric Inpatient Medical Claim dataset of the National Health Insurance Research Database. | Schizophrenia related to daily temperatures |

| Article # | Article Citation     | Country       | Literature Type                                                                                     | Study Design (where applicable) | Participants                           | Outcomes Measured                                                       |
|-----------|----------------------|---------------|-----------------------------------------------------------------------------------------------------|---------------------------------|----------------------------------------|-------------------------------------------------------------------------|
| 238.      | Swim et al. (2009)   | USA           | Literature Review-<br>Narrative Review<br>(psychology and<br>climate change)                        | N/A                             | N/A                                    | N/A                                                                     |
| 239.      | Swim et al. (2011)   | USA           | Literature Review-<br>Narrative Review<br>(Human<br>behaviour,<br>psychology and<br>climate change) | N/A                             | N/A                                    | N/A                                                                     |
| 240.      | Swim et al (2011)    | USA           | Literature Review<br>– Narrative<br>Review<br>(Psychology and<br>climate change)                    | N/A                             | N/A                                    | N/A                                                                     |
| 241.      | Syal et al. (2011)   | USA           | Empirical<br>Research Article                                                                       | Quantitative –<br>Survey        | U.S. Environmental<br>health directors | Individual level<br>beliefs about climate<br>change and human<br>health |
| 242.      | Tapsell (2010)       | Not Specified | Literature Review<br>– Narrative<br>Review (of<br>psychological<br>impacts of<br>flooding)          | N/A                             | N/A                                    | N/A                                                                     |
| 243.      | Thomas et al. (2014) | Not Specified | Literature Review<br>– Narrative<br>Review (climate<br>change impacts on                            | N/A                             | N/A                                    | N/A                                                                     |

| Article # | Article Citation       | Country       | Literature Type                                                        | Study Design (where applicable)                                                                         | Participants                                                                               | Outcomes Measured                           |
|-----------|------------------------|---------------|------------------------------------------------------------------------|---------------------------------------------------------------------------------------------------------|--------------------------------------------------------------------------------------------|---------------------------------------------|
|           |                        |               | health and wellbeing)                                                  |                                                                                                         |                                                                                            |                                             |
| 244.      | Thornley et al. (2015) | New Zealand   | Empirical Research Article                                             | Qualitative – focus groups and interviews                                                               | 92 community-based leaders and residents participated in 11 focus groups and 29 interviews | Community response to earthquake            |
| 245.      | Tierney, K. (2014)     | Global        | Grey Literature (Disasters and social and institutional factors)       | N/A                                                                                                     | N/A                                                                                        | N/A                                         |
| 246.      | THRIVE (2004)          | Various       | Grey Literature (community resilience to health disparities - toolkit) | N/A                                                                                                     | N/A                                                                                        | N/A                                         |
| 247.      | Tobias et al. (2014).  | Canada        | Empirical Research Article                                             | Qualitative – Community based research (Anishinaabe communities in Ontario, Canada; in-depth interviews | Elders of Anishinaabe community (n=46)                                                     | Environmental impacts of land dispossession |
| 248.      | Tong et al. (2010)     | Not Specified | Literature Review – Narrative Review (environmental                    | N/A                                                                                                     | N/A                                                                                        | N/A                                         |

| Article # | Article Citation       | Country   | Literature Type                                                         | Study Design (where applicable)        | Participants                                                                    | Outcomes Measured                                                                                                        |
|-----------|------------------------|-----------|-------------------------------------------------------------------------|----------------------------------------|---------------------------------------------------------------------------------|--------------------------------------------------------------------------------------------------------------------------|
|           |                        |           | health and climate change)                                              |                                        |                                                                                 |                                                                                                                          |
| 249.      | Tonna et al. (2009)    | Australia | Literature Review - Narrative Review (mental health and drought)        | N/A                                    | N/A                                                                             | N/A                                                                                                                      |
| 250.      | Tosone et al. (2015)   | USA       | Empirical Research Article                                              | Quantitative - Survey                  | 244 social workers from New Orleans                                             | Shared Traumatic Stress                                                                                                  |
| 251.      | Trombley et al. (2017) | USA       | Literature Review – Narrative Review (climate change and mental health) | N/A                                    | N/A                                                                             | N/A                                                                                                                      |
| 252.      | Trang et al. (2016)    | Vietnam   | Empirical Research Article                                              | Quantitative - Hospital admission data | Database from Hanoi Mental Hospital covering 5 years from 2008 to 2012 was used | Mental health disorders                                                                                                  |
| 253.      | Truelove et al. (2015) | Sri Lanka | Empirical Research Article                                              | Qualitative – Case study               | 192 paddy farmers from five villages in the dry zone of Sri Lanka.              | Perceptions of drought risk perceptions, beliefs about efficacy, village identification, and perceived descriptive norms |
| 254.      | Turner et al. (2012).  | Australia | Empirical Research Article                                              | Quantitative - Survey                  | 2011 floods on residents of the                                                 | Health impacts of the 2011 flood (mental and physical)                                                                   |

| Article # | Article Citation         | Country           | Literature Type                                                               | Study Design (where applicable)                                              | Participants                                                                                                   | Outcomes Measured                                                                                                                                    |
|-----------|--------------------------|-------------------|-------------------------------------------------------------------------------|------------------------------------------------------------------------------|----------------------------------------------------------------------------------------------------------------|------------------------------------------------------------------------------------------------------------------------------------------------------|
|           |                          |                   |                                                                               |                                                                              | greater Brisbane region                                                                                        |                                                                                                                                                      |
| 255.      | Tunstall et al. (2006).  | England and Wales | Empirical Research Article                                                    | Mixed Methods Research – Survey (General Health Questionnaire and interview) | Sample of residents in 30 flood-affected areas                                                                 | Health effects of flooding                                                                                                                           |
| 256.      | Van Kessel et al. (2014) | Not Specified     | Literature Review – Systematic Review (resilience and disaster interventions) | N/A                                                                          | N/A                                                                                                            | N/A                                                                                                                                                  |
| 257.      | Vasseur et al. (2015)    | Canada            | Empirical Research Article                                                    | Qualitative - Interviews                                                     | Men and women from 10 coastal communities in three provinces (Quebec, New Brunswick, and Prince Edward Island) | Perceptions and reactions to extreme weather                                                                                                         |
| 258.      | Verplanken et al. (2013) | US and Europe     | Empirical Research Article                                                    | Quantitative – Survey                                                        | 132 university men and women                                                                                   | Ecological worrying, environmental attitudes, prevalence of pro-environmental behaviors, pathological worrying, and the Big Five personality traits. |

| Article # | Article Citation         | Country       | Literature Type                                                                   | Study Design (where applicable)                                                                                                           | Participants                                                      | Outcomes Measured               |
|-----------|--------------------------|---------------|-----------------------------------------------------------------------------------|-------------------------------------------------------------------------------------------------------------------------------------------|-------------------------------------------------------------------|---------------------------------|
| 259.      | Vida et al. (2012).      | Canada        | Empirical Research Article                                                        | Quantitative – emergency department visits related to three geographic areas experiencing increased ambient temperature and humidity      | Under age 65 and over age 65 for three geographic areas in Quebec | Mood and behavioural disorders  |
| 260.      | Vins et al. (2015)       | Not Specified | Literature Review – Systematic Review (mental health outcomes related to drought) | N/A                                                                                                                                       | N/A                                                               | N/A                             |
| 261.      | Wainwright et al. (2009) | Global        | Literature Review – Narrative Review (climate change and psychology)              | N/A                                                                                                                                       | N/A                                                               | N/A                             |
| 262.      | Waite et al. (2017)      | England       | Empirical Research Article                                                        | Quantitative – Survey (cross-sectional; survey instruments included: Patient Health Questionnaire, Generalized Anxiety Disorder, and Post | Households that had been flooded between Dec. 2013 and March 2014 | Mental health outcomes of flood |

| Article # | Article Citation    | Country | Literature Type                                            | Study Design (where applicable)                                            | Participants                                                                                                                                         | Outcomes Measured                |
|-----------|---------------------|---------|------------------------------------------------------------|----------------------------------------------------------------------------|------------------------------------------------------------------------------------------------------------------------------------------------------|----------------------------------|
|           |                     |         |                                                            | Traumatic Stress Checklist )                                               |                                                                                                                                                      |                                  |
| 263.      | Wang et al. (2014). | Canada  | Empirical Research Article                                 | Quantitative – Emergency department visits related to ambient temperatures | People who visited Toronto Emergency Room for behavioural and mental disorders during extreme temperatures.                                          | Mental and behavioural disorders |
| 264.      | Weissbecker (2011)  | Global  | Grey Literature (Climate change and human well-being)      | N/A                                                                        | N/A                                                                                                                                                  | N/A                              |
| 265.      | Wenden (2011).      | Global  | Grey Literature (Climate change, vulnerability, and women) | N/A                                                                        | N/A                                                                                                                                                  | N/A                              |
| 266.      | West et al. (2008)  | USA     | Empirical Research Article                                 | Quantitative – Cross-sectional survey                                      | New Orleans Police Department (NOPD) personnel who provided law enforcement and relief services to affected communities following Hurricane Katrina. | Post-Traumatic Stress Disorder   |
| 267.      | White et al. (2016) | Global  | Literature Review – Narrative Review (global               | N/A                                                                        | N/A                                                                                                                                                  | N/A                              |

| Article # | Article Citation      | Country       | Literature Type                                                                               | Study Design (where applicable)        | Participants                                                                                           | Outcomes Measured                                             |
|-----------|-----------------------|---------------|-----------------------------------------------------------------------------------------------|----------------------------------------|--------------------------------------------------------------------------------------------------------|---------------------------------------------------------------|
|           |                       |               | mental health and wellbeing)                                                                  |                                        |                                                                                                        |                                                               |
| 268.      | Wilby et al. (2012)   | Various       | Literature Review – Narrative Review (climate change adaptation to floods)                    | N/A                                    | N/A                                                                                                    | N/A                                                           |
| 269.      | Wilson et al. (2010)  | USA           | Empirical Research Article                                                                    | Quantitative - GIS mapping             | Areas vulnerable to climate change in the USA                                                          | Social and environmental determinants                         |
| 270.      | Winkler et al. (2015) | Not Specified | Literature Review – Narrative Review (of mitigation and adaptation related to climate change) | N/A                                    | N/A                                                                                                    | N/A                                                           |
| 271.      | Wolf et al. (2015)    | Canada        | Empirical Research Article                                                                    | Qualitative- Q interview methods       | Sample of people in two Labrador communities                                                           | Values and traditional practices in climate change adaptation |
| 272.      | Wolkin et al. (2015)  | USA           | Empirical Research Article                                                                    | Qualitative – Interviews and workshops | Nine key informant interviews were conducted with emergency managers; workshop with emergency managers | Social vulnerabilities and approaches to disaster management  |
| 273.      | Wulff et al. (2015)   | Not Specified | Literature Review – Narrative Review (health                                                  | N/A                                    | N/A                                                                                                    | N/A                                                           |



| Article # | Article Citation             | Country       | Literature Type                                                                                     | Study Design<br>(where applicable) | Participants | Outcomes Measured |
|-----------|------------------------------|---------------|-----------------------------------------------------------------------------------------------------|------------------------------------|--------------|-------------------|
|           |                              |               | resilience to disasters)                                                                            |                                    |              |                   |
| 274.      | Yusa et al. (2015)           | Canada        | Literature Review – Narrative Review (climate change, drought, human health)                        | N/A                                | N/A          | N/A               |
| 275.      | Zakour et al. (2013)         | Not Specified | Grey Literature (disaster vulnerability and community)                                              | N/A                                | N/A          | N/A               |
| 276.      | Zaremohzzabieh et al. (2013) | Not Specified | Literature Review – Narrative Review (Role of Internet in flood protection and wellbeing for youth) | N/A                                | N/A          | N/A               |

## References

1. Adger, W. N., Barnett, J., Chapin Iii, F. S., & Ellemor, H. (2011). This must be the place: underrepresentation of identity and meaning in climate change decision-making. *Global Environmental Politics*, 11(2), 1–25. [https://doi.org/10.1162/GLEP\\_a\\_00051](https://doi.org/10.1162/GLEP_a_00051)
2. Ager, J., Fiddian-Qasmiyeh, E., & Ager, A. (2015). Local faith communities and the promotion of resilience in contexts of humanitarian crisis. *Journal of Refugee Studies*, 28(2), 202–221. <https://doi.org/10.1093/jrs/fev001>
3. Agnew, R. (2012). Dire forecast: A theoretical model of the impact of climate change on crime. *Theoretical Criminology*, 16(1), 21–42. <https://doi.org/10.1177/1362480611416843>
4. Aiena, B. J., Baczwaski, B. J., Schulenberg, S. E., & Buchanan, E. M. (2015). Measuring resilience with the RS-14: A tale of two samples. *Journal of Personality Assessment*, 97(3), 291–300. <https://doi.org/10.1080/00223891.2014.951445>
5. Aiena, B. J., Buchanan, E. M., Smith, C. V., & Schulenberg, S. E. (2016). Meaning, Resilience, and Traumatic Stress After the Deepwater Horizon Oil Spill: A Study of Mississippi Coastal Residents Seeking Mental Health Services. *Journal of Clinical Psychology*, 72(12), 1264–1278. <https://doi.org/10.1002/jclp.22232>
6. Aitsi-Selmi, A., & Murray, V. (2015). Protecting the Health and Well-being of Populations from Disasters: Health and Health Care in the Sendai Framework for Disaster Risk Reduction 2015-2030. *Prehospital and Disaster Medicine*, 31(1), 74–78. <https://doi.org/10.1017/S1049023X15005531>
7. Ajibade, I., Armah, F. A., Kuuire, V. Z., Luginaah, I., McBean, G., & Tenkorang, E. Y. (2015). Assessing the bio-psychosocial correlates of flood impacts in coastal areas of Lagos, Nigeria. *Journal of Environmental Planning and Management*, 58(3), 445–463. <https://doi.org/10.1080/09640568.2013.861811>
8. Ajibade, I., McBean, G., & Bezner-Kerr, R. (2013). Urban flooding in Lagos, Nigeria: Patterns of vulnerability and resilience among women. *Global Environmental Change*, 23(6), 1714–1725. <https://doi.org/10.1016/j.gloenvcha.2013.08.009>
9. Alberini, A., Chiabai, A., & Muehlenbachs, L. (2006). Using expert judgment to assess adaptive capacity to climate change: evidence from a conjoint choice survey. *Global Environmental Change*, 16(2), 123–144. <https://doi.org/10.1016/j.gloenvcha.2006.02.001>
10. Albrecht, G., G.M. Sartore, L. Connor, N. Higginbotham, S. Freeman, B. Kelly, H. Stain, A. Tonna, and G. Pollard, 2007: Solastalgia: The distress caused by environmental change. *Australasian Psychiatry*, 15, S95-S98. <http://dx.doi.org/10.1080/10398560701701288>
11. Albrecht, G. (2011). Chronic environmental change: Emerging “psychoterratic” syndromes. In *Climate Change and Human Well-Being*. New York: Springer. ISBN-13: 978-1441997418
12. Alderman, K., Turner, L. R., & Tong, S. (2012). Floods and human health: A systematic review. *Environment International*, 47, 37–47. <https://doi.org/10.1016/j.envint.2012.06.003>

13. Alderman, K., Turner, L. R., & Tong, S. (2013). Assessment of the health impacts of the 2011 summer floods in Brisbane. In *Disaster medicine and public health preparedness* (Vol. 7, pp. 380–386). ISBN: 1938-744X
14. Allen, J., Balfour, R., Bell, R., & Marmot, M. (2014). Social determinants of mental health. *International Review of Psychiatry*, 26(4), 392–407. DOI: 10.3109/09540261.2014.928270
15. Almedom, A. M. (2008). Resilience research and policy/practice discourse in health, social, behavioral, and environmental sciences over the last ten years. *African Health Sciences*, 8(3).
16. Almedom, A. M., Tesfamichael, B., Mohammed, Z. S., Mascie-Taylor, C. G. N., & Alemu, Z. (2007). Use of ‘Sense of Coherence (SOC)’ scale to measure resilience in Eritrea: Interrogating both the data and the scale. *Journal of Biosocial Science*, 39(01), 91-107. DOI:10.1017/S0021932005001112
17. Almedom, A. M., O’Byrne, D., & Jerneck, A. (2015). Principles of epistemological accountability with methodological implications for measuring, assessing, and profiling human resilience. *Ecology and Society*, 20(3). <https://doi.org/10.5751/ES-07313-200309>
18. Ampuero, D., Goldswosthy, S., Delgado, L. E., & Miranda J, C. (2015). Using mental well-being impact assessment to understand factors influencing well-being after a disaster. *Impact Assessment and Project Appraisal*, 33(3), 184–194. <https://doi.org/10.1080/14615517.2015.1023564>
19. Anderson, D. (2009). Enduring drought then coping with climate change: Lived experience and local resolve in rural mental health. *Rural Society*, 19(4), 340–352. <https://doi.org/10.5172/rsj.351.19.4.340>
20. Anderson, P., & Jané-Llopis, E. (2011). Mental health and global well-being. *Health Promotion International*, 26(SUPPL. 1). <https://doi.org/10.1093/heapro/dar060>
21. Anderson, H., Brown, C., Cameron, L. L., Christenson, M., Conlon, K. C., Dorevitch, S., ... & Hanson, A. (2017). Climate and health intervention assessment: evidence on public health interventions to prevent the negative health effects of climate change. *Climate and health technical report series. BRACE Midwest and Southeast Community of Practice. Climate and Health Program, Centers for Disease Control and Prevention.*
22. Asugeni, J., MacLaren, D., Massey, P. D., & Speare, R. (2015). Mental health issues from rising sea level in a remote coastal region of the Solomon Islands: current and future. *Australasian Psychiatry: Bulletin of Royal Australian and New Zealand College of Psychiatrists*, 23(6), 22–25. <https://doi.org/10.1177/1039856215609767>
23. Austin, S. E., Ford, J. D., Berrang-Ford, L., Araos, M., Parker, S., & Fleury, M. D. (2015). Public health adaptation to climate change in Canadian jurisdictions. *International Journal of Environmental Research and Public Health*, 12(1), 623–651. <https://doi.org/10.3390/ijerph120100623>
24. Azuma, K., Ikeda, K., Kagi, N., Yanagi, U., Hasegawa, K., & Osawa, H. (2014). Effects of water-damaged homes after flooding: health status of the residents and the environmental risk factors. *International journal of environmental health research*, 24(2), 158-175. DOI:10.1080/09603123.2013.800964

25. Bajayo, R. (2012). Building community resilience to climate change through public health planning. *Health Promotion Journal of Australia*, 23(1), 30–36.
26. Bardsley, D. K., & Wiseman, N. D. (2012). Climate change vulnerability and social development for remote indigenous communities of South Australia. *Global Environmental Change*, 22(3), 713–723. <https://doi.org/10.1016/j.gloenvcha.2012.04.003>
27. Barnett, J., Evans, L. S., Gross, C., Kiem, A. S., Kingsford, R. T., Palutikof, J. P., ... & Smithers, S. G. (2015). From barriers to limits to climate change adaptation: path dependency and the speed of change. *Ecology and Society*, 20(3). <http://dx.doi.org/10.5751/ES-07698-200305>
28. Bei, B., C. Bryant, K.M. Gilson, J. Koh, P. Gibson, A. Komiti, H. Jackson, and F. Judd, 2013: A prospective study of the impact of floods on the mental and physical health of older adults. *Aging & Mental Health*, 17, 992-1002. <http://dx.doi.org/10.1080/13607863.2013.799119>
29. Bélanger, D., Gosselin, P., Valois, P., & Abdous, B. (2014). Perceived adverse health effects of heat and their determinants in deprived neighbourhoods: A cross-sectional survey of nine cities in Canada. *International Journal of Environmental Research and Public Health*, 11(11), 11028–11053. <https://doi.org/10.3390/ijerph111111028>
30. Bell, E. (2012). Readyng health services for climate change: A policy framework for regional development. *American Journal of Public Health*, 101(5), 804–813. DOI: 10.2105/AJPH.2010.202820
31. Bergström, J., & Dekker, S. W. A. (2014). Bridging the macro and the micro by considering the meso: Reflections on the fractal nature of resilience. *Ecology and Society*, 19(4). <https://doi.org/10.5751/ES-06956-190422>
32. Berkes, F., & Ross, H. (2013). Community Resilience: Toward an Integrated Approach. *Society and Natural Resources*, 26(1), 5–20. <https://doi.org/10.1080/08941920.2012.736605>
33. Berry, H. L., Kelly, B. J., Hanigan, I. C., Coates, J. H., McMichael, A. J., Welsh, J. A., & Kjellstrom, T. (2008a). Rural mental health impacts of climate change. Commissioned report for the Garnaut Climate Change Review. Canberra: The Australian National University.
34. Berry, H. L., Kelly, B. J., Hanigan, I. C., Coates, J. H., McMichael, A. J., Welsh, J. A., & Kjellstrom, T. (2008b). Rural mental health impacts of climate change. *Commissioned report for the Garnaut Climate Change Review*. Canberra: The Australian National University.
35. Berry, H. L., & Shipley, M. (2009a). Longing to belong: personal social capital and psychological distress in an Australian coastal region. Department of Families, Housing, Community Services and Indigenous Affairs.
36. Berry, H. (2009b). Pearl in the oyster: Climate change as a mental health opportunity. *Australasian Psychiatry*, 17(6), 453–456. DOI:10.1080/10398560903045328
37. Berry, H. L., Bowen, K., & Kjellstrom, T. (2010a). Climate change and mental health: A causal pathways framework. *International Journal of Public Health*, 55, 123–132. DOI:10.1007/s00038-009-0112-0

38. Berry, H. L., Butler, J. R. A., Burgess, C. P., King, U. G., Tsey, K., Cadet-James, Y. L., ... Raphael, B. (2010b). Mind, body, spirit: Co-benefits for mental health from climate change adaptation and caring for country in remote Aboriginal Australian communities. *New South Wales Public Health Bulletin*, 21(5–6), 139–145. <https://doi.org/10.1071/NB10030>
39. Berry, H. L., Hogan, A., Owen, J., Rickwood, D., & Fragar, L. (2011). Climate change and farmers' mental health: risks and responses. *Asia-Pacific Journal of Public Health*, 23(2), 119–132. DOI: 10.1177/1010539510392556
40. Birkmann, J., Buckle, P., Jaeger, J., Pelling, M., Setiadi, N., Garschagen, M., ... Kropp, J. (2010). Extreme events and disasters: A window of opportunity for change? Analysis of organizational, institutional and political changes, formal and informal responses after mega-disasters. *Natural Hazards*, 55(3), 637–655. <https://doi.org/10.1007/s11069-008-9319-2>
41. Bonanno, G. A. (2012). Uses and abuses of the resilience construct: Loss, trauma, and health-related adversities. *Social Science & Medicine*, 74(5), 753–756. DOI:10.1016/j.socscimed.2011.11.022
42. Bourque, F., & Cunsolo Willox, A. (2014). Climate change: The next challenge for public mental health? *International Review of Psychiatry*, 26(4), 415–422.
43. Bowles, D. C. (2015). Climate change and health adaptation: Consequences for indigenous physical and mental health. *Annals of Global Health*, 81(3), 427–431. <https://doi.org/10.1016/j.aogh.2015.06.004>
44. Bragg, E., & Reser, J. (2012). Ecopsychology in the antipodes: Perspectives from Australia and New Zealand. *Ecopsychology*, 4(4), 253–265. <https://doi.org/10.1089/eco.2012.0085>
45. Brown, K. (2015). *Resilience, development and global change*. Routledge.
46. Brown, K., & Westaway, E. (2011). Agency, capacity, and resilience to environmental change: lessons from human development, well-being, and disasters. *Annual Review of Environment and Resources*, 36(1), 321. <https://doi.org/10.1146/annurev-environ-052610-092905>
47. Bunch, M. J., Morrison, K. E., Parkes, M. W., & Venema, H. D. (2011). Promoting health and well-being by managing for social–ecological resilience: the potential of integrating ecohealth and water resources management approaches. *Ecology and Society*, 16(1).
48. Bunyavanich, S., Landrigan, C. P., McMichael, A. J., & Epstein, and P. R. (2003). The impact of climate change on child health. *Ambulatory*, 3(1), 44–52. [https://doi.org/10.1367/1539-4409\(2003\)003<0044:TIOCCO>2.0.CO;2](https://doi.org/10.1367/1539-4409(2003)003<0044:TIOCCO>2.0.CO;2)
49. Burch, S., Shaw, A., Dale, A., & Robinson, J. (2014). Triggering transformative change: A development path approach to climate change response in communities. *Climate Policy*, 14(4), 467–487. doi:10.1080/14693062.2014.876342
50. Burch, S. (2010). Transforming barriers into enablers of action on climate change: Insights from three municipal case studies in British Columbia, Canada. *Global Environmental Change*, 20(2), 287–297. doi:10.1016/j.gloenvcha.2009.11.009
51. Burton, H., Rabito, F., Danielson, L., & Takaro, T. K. (2016). Health effects of flooding in Canada: A 2015 review and description of gaps in research. *Canadian Water Resources Journal*, 41(1–2), 238–249. <https://doi.org/10.1080/07011784.2015.1128854>

52. Butler, C. D., Bowles, D. C., McIver, L., & Page, L. (2014). 26 Mental Health, Cognition and the Challenge of Climate Change. *Climate change and global health*, 251.
53. Berkes, F. and D. Jolly. 2001. Adapting to climate change: Social-ecological resilience in a Canadian western arctic community. *Conservation Ecology* 5 (2): 18–39.
54. Cameron, E. S. (2012). Securing indigenous politics: A critique of the vulnerability and adaptation approach to the human dimensions of climate change in the Canadian arctic. *Global Environmental Change*, 22(1), 103–114. <https://doi.org/10.1016/j.gloenvcha.2011.11.004>
55. Cardwell, F. S., & Elliott, S. J. (2013). Making the links: do we connect climate change with health? A qualitative case study from Canada. *BMC Public Health*, 13(1), 1. DOI: 10.1186/1471-2458-13-208
56. Carnie, T.-L., Berry, H. L., Blinkhorn, S. A., & Hart, C. R. (2011). In their own words: Young people’s mental health in drought-affected rural and remote NSW. *Australian Journal of Rural Health*, 19(5), 244–248. <https://doi.org/10.1111/j.1440-1584.2011.01224.x>
57. Carroll, B., Balogh, R., Morbey, H., & Araoz, G. (2010). Health and social impacts of a flood disaster: responding to needs and implications for practice. *Disasters*, 34(4), 1045–1063. DOI:10.1111/j.1467-7717.2010.01182.x
58. Carroll, B., Morbey, H., Balogh, R., & Araoz, G. (2009). Flooded homes, broken bonds, the meaning of home, psychological processes and their impact on psychological health in a disaster. *Health & Place*, 15(2), 540–547. <https://doi.org/10.1016/j.healthplace.2008.08.009>
59. Castleden, M., McKee, M., Murray, V., & Leonardi, G. (2011). Resilience thinking in health protection. *Journal of Public Health*, 33(3), 369–377. DOI:10.1093/pubmed/fdr027
60. Chand, P. K., & Murthy, P. (2008). Climate change and mental health. In *Regional Health Forum* (Vol. 12, pp. 43–48).
61. Cheng, J. J., & Berry, P. (2013). Health co-benefits and risks of public health adaptation strategies to climate change: A review of current literature. *International Journal of Public Health*, 58(2), 305–311. <https://doi.org/10.1007/s00038-012-0422-5>
62. Cheshire, L., Esparcia, J., & Shucksmith, M. (2015). Community resilience, social capital and territorial governance [Resiliencia comunitaria, capital social y gobernanza territorial]. *Ager*, (18), 7–38. <https://doi.org/10.4422/ager.2015.08>
63. Chowdhury, P. D., Haque, C. E., & Smith, G. (2011). A critical review of climate change induced psychosocial impacts and options for strengthening social support systems. *American Journal of Environmental Sciences*, 7(4), 316. DOI: 10.3844/ajessp.2011.316.330
64. Cameron, E., Mearns, R., & McGrath, J. T. (2015). Translating climate change: Adaptation, resilience, and climate politics in Nunavut, Canada. *Annals of the Association of American Geographers*, 105(2), 274–283. <https://doi.org/10.1080/00045608.2014.973006>
65. Clarke, K. L., & Berry, P. (2012). From theory to practice: a Canadian case study of the utility of climate change adaptation frameworks to address health impacts. *International Journal of Public Health*, 57(1), 167–174. DOI: 10.1007/s00038-011-0292-2

66. Clayton, S., Manning, C. M., & Hodge C. (2014). Beyond storms & droughts: The psychological impacts of climate change. Washington, DC: American Psychological Association and ecoAmerica.
67. Clayton, S., Manning, C. M., Krygsman, K., & Speiser, M. (2017). Mental Health and Our Changing Climate: Impacts, Implications, and Guidance. Washington, D.C.: American Psychological Association, and ecoAmerica.
68. Congues, J. M. (2014). Promoting collective well-being as a means of defying the odds: Drought in the Goulburn Valley, Australia. *Rural Society*, 20(3), 229–242. <https://doi.org/10.1080/10371656.2014.11082067>
69. Coombe, J., Mackenzie, L., Munro, R., Hazell, T., Perkins, D., & Reddy, P. (2015). Teacher-mediated interventions to support child mental health following a disaster: A systematic review. *PLoS Currents*, 7(DISASTERS). <https://doi.org/10.1371/currents.dis.466c8c96d879e2663a1e5e274978965d>
70. Costello, A., Abbas, M., Allen, A., Ball, S., Bell, S., Bellamy, R., ... Patterson, C. (2009). Managing the health effects of climate change. Lancet and University College London Institute for Global Health Commission. *The Lancet*, 373(9676), 1693–1733. [https://doi.org/10.1016/S0140-6736\(09\)60935-1](https://doi.org/10.1016/S0140-6736(09)60935-1)
71. Cox, R. S., & Hamlen, M. (2015). Community disaster resilience and the rural resilience index. *American Behavioral Scientist*, 59(2), 220-237. <https://doi.org/10.1177/0002764214550297>
72. Crabtree, A. (2012). Climate change and mental health following flood disasters in developing countries, A review of the epidemiological literature: What do we know, what is being recommended? *Australasian Journal of Disaster and Trauma Studies*, 12(1), 21–30.
73. Crabtree, A. (2013). Questioning Psychosocial Resilience After Flooding and the Consequences for Disaster Risk Reduction. *Social Indicators Research*, 113(2), 711–728. <https://doi.org/10.1007/s11205-013-0297-8>
74. Cunsolo Willox, A., Harper, S. L., Ford, J. D., Landman, K., Houle, K., & Edge, V. L. (2012). “From this place and of this place:” Climate change, sense of place, and health in Nunatsiavut, Canada. *Social Science & Medicine*, 75(3), 538–547. DOI:10.1016/j.socscimed.2012.03.043
75. Cunsolo Willox, A. C., Harper, S. L., Edge, V. L., Landman, K., Houle, K., & Ford, J. D. (2013a). The land enriches the soul: On climatic and environmental change, affect, and emotional health and well-being in Rigolet, Nunatsiavut, Canada. *Emotion Space and Society*, 6, 14-24. <https://doi.org/10.1016/j.emospa.2011.08.005>
76. Cunsolo Willox, A., Harper, S. L., & Ford, J. D. (2013b). Climate change and mental health: An exploratory case study from Rigolet. Nunatsiavut: Canada. *Climatic Change*, 121(2), 255-270.
77. Cunsolo Willox, A., Stephenson, E., Allen, J., Bourque, F., Drossos, A., Elgarøy, S., ... Wexler, L. (2014). Examining relationships between climate change and mental health in the Circumpolar North. *Regional Environmental Change*, 15(1), 169–182. <https://doi.org/10.1007/s10113-014-0630-z>
78. Cusack, L., de Crespigny, C., & Athanasos, P. (2011). Heatwaves and their impact on people with alcohol, drug and mental health conditions: a discussion paper on clinical practice considerations. *Journal of Advanced Nursing*, 67(4), 915–922. DOI:10.1111/j.1365-2648.2010.05551.x

79. Cutter, S.L., Barnes, L., Berry, M., Burton, C.G., Evans, E., Tate, E.C., Webb, J., 2008. Community and regional resilience: perspectives from hazards, disasters, and emergency management. In: CARRI Research Report 1 Community and Regional Resilience Institute, Oak Ridge, TN.
80. Davidson, J. R. T., & McFarlane, A. C. (2006). The extent and impact of mental health problems after disaster. *Journal of Clinical Psychiatry*, 67, 9–14.
81. Dean, J. G., & Stain, H. J. (2010). Mental health impact for adolescents living with prolonged drought. *Australian Journal of Rural Health*, 18(1), 32–37. DOI: 10.1111/j.1440-1584.2009.01107.x
82. Dean, J., van Dooren, K., & Weinstein, P. (2011). Does biodiversity improve mental health in urban settings? *Medical Hypotheses*, 76(6), 877–880. <https://doi.org/10.1016/j.mehy.2011.02.040>
83. Deeming, H., Fordham, M., & Swartling, A. G. (2014). Resilience and adaptation to hydrometeorological hazards. *Hydrometeorological Hazards*, 291-316. <https://doi.org/10.1002/9781118629567.ch4b>
84. Deppisch, S., & Hasibovic, S. (2013). Social-ecological resilience thinking as a bridging concept in transdisciplinary research on climate-change adaptation. *Natural Hazards*, 67(1), 117–127. <https://doi.org/10.1007/s11069-011-9821-9>
85. Dodgen, D., D. Donato, N. Kelly, A. La Greca, J. Morganstein, J. Reser, J. Ruzek, S. Schweitzer, M.M. Shimamoto, K. Thigpen Tart, and R. Ursano, 2016: Ch. 8: Mental Health and Well-Being. The Impacts of Climate Change on Human Health in the United States: A Scientific Assessment. U.S. Global Change Research Program, Washington, DC, 217–246. <http://dx.doi.org/10.7930/J0TX3C9H>
86. Doherty, T. J., & Clayton, S. (2011). The psychological impacts of global climate change. *American Psychologist*, 66(265–276), 10–1037. <http://dx.doi.org/10.1037/a0023141>
87. Dorji, C. (2006). Mental health and psychosocial aspects of disaster preparedness in Bhutan. *International Review of Psychiatry*, 18(6), 537–546. DOI:10.1080/09540260601037979
88. Douglas, E. M., Kirshen, P. H., Paolisso, M., Watson, C., Wiggin, J., Enrici, A., & Ruth, M. (2012). Coastal flooding, climate change and environmental justice: identifying obstacles and incentives for adaptation in two metropolitan Boston Massachusetts communities. *Mitigation and Adaptation Strategies for Global Change*, 17(5), 537–562. <https://doi.org/10.1007/s11027-011-9340-8>
89. Durkalec, A., Furgal, C., Skinner, M. W., & Sheldon, T. (2015). Climate change influences on environment as a determinant of Indigenous health: Relationships to place, sea ice, and health in an Inuit community. *Social Science and Medicine*, 136–137, 17–26. <https://doi.org/10.1016/j.socscimed.2015.04.026>
90. Ebi, K. L., & Bowen, K. (2016). Extreme events as sources of health vulnerability: Drought as an example. *Weather and Climate Extremes*, 11, 95–102. <https://doi.org/10.1016/j.wace.2015.10.001>
91. Edwards, B., Gray, M., & Hunter, B. (2015). The Impact of Drought on Mental Health in Rural and Regional Australia. *Social Indicators Research*, 121(1), 177–194. <https://doi.org/10.1007/s11205-014-0638-2>



92. Edwards, T., & Wiseman, J. (2011). Climate change, resilience and transformation: challenges and opportunities for local communities. In *Climate Change and Human Well-Being*. New York: Springer.
93. Eichler, M. (2015). Raising children to cope with climate change?. *Canadian Review of Sociology/Revue canadienne. De*, 52(2), 232–240. <https://doi.org/10.1111/cars.12075>
94. Eisenman, D., McCaffrey, S., Donatello, I., & Marshal, G. (2015). An Ecosystems and Vulnerable Populations Perspective on Solastalgia and Psychological Distress After a Wildfire. *EcoHealth*, 12(4), 602–610. <https://doi.org/10.1007/s10393-015-1052-1>
95. Evans, L. S., Hicks, C. C., Adger, W. N., Barnett, J., Perry, A. L., Fidelman, P., & Tobin, R. (2016). Structural and psychosocial limits to climate change adaptation in the great barrier reef region. *PloS*, 11(3), 150575. <https://doi.org/10.1371/journal.pone.0150575>
96. Every-Palmer, S., McBride, S., Berry, H., & Menkes, D. B. (2016). Climate change and psychiatry. *Australian and New Zealand Journal of Psychiatry*, 50(1), 16–18. <https://doi.org/10.1177/0004867415615946>
97. Fernandez, A., Black, J., Jones, M., Wilson, L., Salvador-Carulla, L., Astell-Burt, T., & Black, D. (2015). Flooding and mental health: A systematic mapping review. *PLoS ONE*, 10(4). <https://doi.org/10.1371/journal.pone.0119929>
98. Few, R., Ahern, M., Matthies, F., & Kovats, S. (2004). Floods, health and climate change: a strategic review. Norwich: Tyndall Centre for Climate Change Research.
99. Fleming, A., Dowd, A.-M., Gaillard, E., Park, S., & Howden, M. (2015). “Climate change is the least of my worries”: Stress limitations on adaptive capacity. *Rural Society*, 24(1), 24–41. <https://doi.org/10.1080/10371656.2014.1001481>
100. Ford, J. D. (2012). Indigenous health and climate change. *American Journal of Public Health*, 102(7), 1260–1266. <https://doi.org/10.2105/AJPH.2012.300752>
101. Ford, J. D., Stephenson, E., Cunsolo Willox, A., Edge, V., Farahbakhsh, K., Furgal, C., ... Sherman, M. (2016). Community-based adaptation research in the Canadian Arctic. *Wiley Interdisciplinary Reviews: Climate Change*, 7(2), 175–191. <https://doi.org/10.1002/wcc.376>
102. Fresque-Baxter, J. A., & Armitage, D. (2012). Place identity and climate change adaptation: A synthesis and framework for understanding. *Wiley Interdisciplinary Reviews: Climate Change*, 3(3), 251–266. <https://doi.org/10.1002/wcc.164>
103. Friel, S., Berry, H., Dinh, H., O’Brien, L., & Walls, H. L. (2014). The impact of drought on the association between food security and mental health in a nationally representative Australian sample. *BMC Public Health*, 14, 1102. <https://doi.org/10.1186/1471-2458-14-1102>
104. Fritze, J. G., Blashki, G. A., Burke, S., & Wiseman, J. (2008). Hope, despair and transformation: Climate change and the promotion of mental health and wellbeing. *International Journal of Mental Health Systems*, 2, 1–13. <https://doi.org/10.1186/1752-4458-2-13>

105. Fundter, D. Q., Jonkman, B., Beerman, S., Goemans, C. L., Briggs, R., Coumans, F., & Bierens, J. (2008). Health impacts of large-scale floods: governmental decision-making and resilience of the citizens. *Prehospital and Disaster Medicine*, 23(2), 70–73. <https://doi.org/10.1017/S1049023X00021282>
106. Furgal, C., Buell, M., Chan, L., Edge, V., Martin, D., & Ogden, N. (2008). Health impacts of climate change in Canada's North. Human health in a changing climate: a Canadian assessment of vulnerabilities and adaptive capacity. Health Canada, Ottawa.
107. Füssel, H. M. (2007). Vulnerability: a generally applicable conceptual framework for climate change research. *Global environmental change*, 17(2), 155-167. <https://doi.org/10.1016/j.gloenvcha.2006.05.002>
108. Galea, S., Brewin, C. R., Gruber, M., Jones, R. T., King, D. W., King, L. A., ... & Kessler, R. C. (2007). Exposure to hurricane-related stressors and mental illness after Hurricane Katrina. *Archives of general psychiatry*, 64(12), 1427-1434. DOI:10.1001/archpsyc.64.12.1427
109. Gibbs, L., Waters, E., Bryant, R. A., Pattison, P., Lusher, D., Harms, L., ... Forbes, D. (2013). Beyond Bushfires: Community, Resilience and Recovery - A longitudinal mixed method study of the medium to long term impacts of bushfires on mental health and social connectedness. *BMC Public Health*, 13(1). <https://doi.org/10.1186/1471-2458-13-1036>
110. Gifford, R. (2011). The dragons of inaction: Psychological barriers that limit climate change mitigation and adaptation. *American Psychologist*, 66, 290-302. DOI:10.1037/a0023566
111. Goh, A. H. (2012). A literature review of the gender-differentiated impacts of climate change on women's and men's assets and well-being in developing countries. International Food Policy Research Institute, CAPRI Work.
112. Gray, S. (2008). Long-term health effects of flooding. *Journal of Public Health*, 30(4), 353–354. <https://doi.org/10.1093/pubmed/fdn092>
113. Green, D., & Minchin, L. (2014). Living on climate-changed country: Indigenous health, well-being and climate change in remote Australian communities. *EcoHealth*, 11(2), 263–272. <https://doi.org/10.1007/s10393-013-0892-9>
114. Green, D., Niall, S., & Morrison, J. (2012). Bridging the gap between theory and practice in climate change vulnerability assessments for remote Indigenous communities in northern Australia. *Local Environment*, 17(3), 295–315. <https://doi.org/10.1080/13549839.2012.665857>
115. Greene, G., Paranjothy, S., & Palmer, S. R. (2015). Resilience and vulnerability to the psychological harm from flooding: The role of social cohesion. *American Journal of Public Health*, 105(9), 1792–1795. <https://doi.org/10.2105/AJPH.2015.302709>
116. Greene, R. R. (2014). Resilience as Effective Functional Capacity: An Ecological-Stress Model. *Journal of Human Behavior in the Social Environment*, 24(8), 937–950. <https://doi.org/10.1080/10911359.2014.921589>
117. Gruebner, O., Lowe, S. R., Sampson, L., & Galea, S. (2015). The geography of post-disaster mental health: Spatial patterning of psychological vulnerability and resilience factors in New York City after Hurricane Sandy. *International Journal of Health Geographics*, 14(1). <https://doi.org/10.1186/s12942-015-0008-6>

118. Gunn, K. M., Kettler, L. J., Skaczkowski, G. L. A., & Turnbull, D. A. (2012). Farmers' stress and coping in a time of drought. *Rural and Remote Health*, 12(4).
119. Gutierrez, K. S., & LePrevost, C. E. (2016). Climate justice in rural southeastern United States: A review of climate change impacts and effects on human health. *International Journal of Environmental Research and Public Health*, 13(2). <https://doi.org/10.3390/ijerph13020189>
120. Hanigan, I. C., Butler, C. D., Kokic, P. N., & Hutchinson, M. F. (2012). Suicide and drought in New South Wales, Australia, 1970–2007. In *Proceedings of the National Academy of Sciences* (Vol. 109, pp. 13950–13955).
121. Hannigan, B., & Coffey, M. (2011). Where the wicked problems are: The case of mental health. *Health Policy*, 101(3), 220–227. <https://doi.org/10.1016/j.healthpol.2010.11.002>
122. Harper, S. L., Edge, V. L., Ford, J., Willox, A. C., Wood, M., McEwen, S. A., ... Namanya, D. B. (2015). Climate-sensitive health priorities in Nunatsiavut, Canada. *BMC Public Health*, 15(1). <https://doi.org/10.1186/s12889-015-1874-3>
123. Hart, C. R., Berry, H. L., & Tonna, A. M. (2011). Improving the mental health of rural New South Wales communities facing drought and other adversities. *Australian Journal of Rural Health*, 19(5), 231–238. <https://doi.org/10.1111/j.1440-1584.2011.01225.x>
124. Henderson, S., & Mulder, R. (2015). Climate change and mental disorders. *Australian and New Zealand Journal of Psychiatry*, 49(11), 1061–1062. <https://doi.org/10.1177/0004867415610639>
125. Höfler, M. (2014). Psychological Resilience Building in Disaster Risk Reduction: Contributions from Adult Education. *International Journal of Disaster Risk Science*, 5(1), 33–40. <https://doi.org/10.1007/s13753-014-0009-2>
126. Holmes, T. (2015). Community Risk and Resilience to Climate Hazards and Extreme. In *Events in the Turtle Region of Trinidad*.
127. Holmgren, D. (2012). *Future scenarios: how communities can adapt to peak oil and climate change*. Chelsea: Green Publishing.
128. Hunter, E. (2009). “Radical hope” and rain: Climate change and the mental health of Indigenous residents of northern Australia. *Australasian Psychiatry*, 17(6), 445–452. <https://doi.org/10.1080/10398560903062927>
129. Hutton, D. (2005). *Psychosocial Aspects of Climate Change in Canada: A Review of Current Literature and Research Recommendations*. Health Canada.
130. Imperiale, A. J., & Vanclay, F. (2016). Experiencing local community resilience in action: Learning from post-disaster communities. *Journal of Rural Studies*, 47, 204–219. <https://doi.org/10.1016/j.jrurstud.2016.08.002>
131. Inder, K. J., Berry, H., & Kelly, B. J. (2011). Using cohort studies to investigate rural and remote mental health. *Australian Journal of Rural Health*, 19(4), 171–178. <https://doi.org/10.1111/j.1440-1584.2011.01208.x>
132. Jain, V. (2015). The Post-2015 Sustainable Development Agenda—Are We Doing Mental Health Justice? *Annals of Global Health*, 81(3), 461–462. <https://doi.org/10.1016/j.aogh.2015.06.009>

133. Jane-Llopis, E., Anderson, P., Stewart-Brown, S., Weare, K., Wahlbeck, K., McDaid, D., ... Litchfield, P. (2011). Reducing the silent burden of impaired mental health. *Journal of Health Communication, 16*(SUPPL. 2), 59–74. <https://doi.org/10.1080/10810730.2011.601153>
134. Jaspal, R., Nerlich, B., & Cinnirella, M. (2014). Human responses to climate change: Social representation, identity and socio-psychological action. *Environmental Communication, 8*(1), 110–130. <https://doi.org/10.1080/17524032.2013.846270>
135. Jenkins, R., Baingana, F., Ahmad, R., McDaid, D., & Atun, R. (2011). International and national policy challenges in mental health. *Mental Health in Family Medicine, 8*(2), 101.
136. Joerin, J., Ramasamy, R., Krishnamurthy, R. (2014). The concept of resilience to disasters. *Community, Environment and Disaster Risk Management, 15*, 35–48. <https://doi.org/10.1108/S2040-726220140000015002>
137. Jones, M. K., Wootton, B. M., Vaccaro, L. D., & Menzies, R. G. (2012). The impact of climate change on obsessive compulsive checking concerns. *Australian and New Zealand Journal of Psychiatry, 46*(3), 265–270. DOI:10.1177/0004867411433951
138. Keim, M. E. (2008). Building Human Resilience. The Role of Public Health Preparedness and Response as an Adaptation to *Climate Change. American Journal of Preventive Medicine, 35*(5), 508–516. <https://doi.org/10.1016/j.amepre.2008.08.022>
139. Keim, M. E. (2011). Preventing disasters: Public health vulnerability reduction as a sustainable adaptation to climate change. *Disaster Medicine and Public Health Preparedness, 5*(2), 140–148. <https://doi.org/10.1001/dmp.2011.30>
140. Keller, R. C. (2013). Place matters: Mortality, space, and urban form in the 2003 Paris heat wave disaster. *French Historical Studies, 36*(2), 299-330. <https://doi.org/10.1215/00161071-1960682>
141. Kessler, R. C., Galea, S., Gruber, M. J., Sampson, N. A., Ursano, R. J., & Wessely, and S. (2008). Trends in mental illness and suicidality after Hurricane Katrina. *Molecular Psychiatry, 13*, 374–384. <https://doi.org/doi:10.1038>
142. Kirmayer, L. J., Dandeneau, S., Marshall, E., Phillips, M. K., & Williamson, K. J. (2011). Rethinking resilience from indigenous perspectives. *Canadian Journal of Psychiatry, 56*(2), 84–91. DOI:10.1177/070674371105600203
143. Kjellstrom, T., & McMichael, A. J. (2013). Climate change threats to population health and well-being: The imperative of protective solutions that will last. *Global Health Action, 6*(1). <https://doi.org/10.3402/gha.v6i0.20816>
144. Koger, S. M., Leslie, K. E., & Hayes, E. D. (2011). Climate change: Psychological solutions and strategies for change. *Ecopsychology, 3*(4), 227–235. <https://doi.org/10.1089/eco.2011.0041>
145. Kuehne, G. (2014). How do farmers' climate change beliefs affect adaptation to climate change? *Society & Natural Resources, 27*(5), 492–506. <https://doi.org/10.1080/08941920.2013.861565>
146. Natalia, K. (2011). Climate change effects on human health in a gender perspective: some trends in Arctic research. *Global Health Action, 4*(1), 7913. DOI: 10.3402/gha.v4i0.7913
147. LaLone, M. B. (2012). Neighbors helping neighbors: An examination of the social capital mobilization process for community resilience to environmental disasters. *Journal of Applied Social Science, 6*(2), 209-237.

148. Lamond, J. (2014). The role of flood memory in the impact of repeat flooding on mental health. *WIT Transactions on Ecology and the Environment*, 184, 187–199. <https://doi.org/10.2495/FRIAR140161>
149. Lang, C. (2015). Climate change and mental health. *Psychiatric Times*, 32(10), 1-1.
150. Leff, J. (2008). Climate change in psychiatry: periodic fluctuations or terminal trend. *Society and, psychosis*, 11. ISBN: 978-052-68959-5
151. Leslie, P., & McCabe, J. T. (2013). Response diversity and resilience in social-ecological systems. *Current Anthropology*, 54(2), 114.
152. Levine, S., Ludi, E., & Jones, L. (2011). Rethinking support for adaptive capacity to climate change. In *Oxfam Policy and Practice: Climate Change and Resilience* (Vol. 7, pp. 49–97).
153. Levy, B. S., & Patz, J. A. (2015). Climate change, human rights, and social justice. *Annals of Global Health*, 81(3), 310–322. <https://doi.org/10.1016/j.aogh.2015.08.008>
154. Lindahl, K. K., Balajee, S. S., & Wiggins, N. (2013). Complete health equity: Bringing mental health into the equity dialogue. In *Social Sustainability* (pp. 176-200). Routledge.
155. Loboda, T. V. (2014b). Adaptation strategies to climate change in the Arctic: A global patchwork of reactive community-scale initiatives. *Environmental Research Letters*, 9(11). <https://doi.org/10.1088/1748-9326/9/11/111006>
156. Lorenz, D. F., & Dittmer, C. (2016). Resilience in catastrophes, disasters and emergencies. In *New perspectives on resilience in socio-economic spheres* (pp. 25-59). Springer VS, Wiesbaden.
157. Lowe, D., Ebi, K.L., Forsberg, B. (2013). Factors increasing vulnerability to health effects before, during, and after floods. *Int. J. Environ. Res. Public Health* 10, 7015-7067. doi: 10.3390/ijerph10127015
158. Luber, G., & Lemery, J. (2015). Global climate change and human health: From science to practice. John Wiley & Sons. Chapter. 10 Climate change and population mental health by Abdulrahman M. El Sayed, and Sandro Galea
159. MacDonald, J. P., Willox, A. C., Ford, J. D., Shiwak, I., Wood, M., & Team, I. M. H. A. C. C. (2015). Protective factors for mental health and well-being in a changing climate: Perspectives from Inuit youth in Nunatsiavut, Labrador. *Social Science & Medicine*, 141, 133–141. <https://doi.org/10.1016/j.socscimed.2015.07.017>
160. Manyena, S. B. (2014). Disaster resilience: A question of “multiple faces” and “multiple spaces”? *International Journal of Disaster Risk Reduction*, 8, 1–9. <https://doi.org/10.1016/j.ijdr.2013.12.010>
161. Marinucci, G. D., Luber, G., Uejio, C. K., Saha, S., & Hess, J. J. (2014). Building resilience against climate effects—A novel framework to facilitate climate readiness in public health agencies. *International journal of environmental research and public health*, 11(6), 6433-6458.
162. MacDonald, J. P., Harper, S. L., Willox, A. C., & Edge, V. L. (2013). A necessary voice: Climate change and lived experiences of youth in Rigolet, Nunatsiavut, Canada. *Global Environmental Change*, 23(1), 360-371. <https://doi.org/10.1016/j.gloenvcha.2012.07.010>

163. McFarlane, A. C., & Williams, R. (2012). Mental health services required after disasters: Learning from the lasting effects of disasters. In *Depression research and treatment, 2012*, <http://dx.doi.org/10.1155/2012/970194>
164. Miles, S.B., Chang, S.E., 2011. ResilUS: a community based disaster resilience model. *Cartogr. Geogr. Inform. Sci.* 38, 36 <https://doi.org/10.1559/1523040638136>
165. Molnar, J. J. (2010). Climate change and societal response: Livelihoods, communities, and the environment. *Rural Sociology*, 75(1), 1–16. <https://doi.org/10.1111/j.1549-0831.2010.00011.x>
166. Motesharrei, S., Rivas, J., Kalnay, E., Asrar, G. R., Busalacchi, A. J., Cahalan, R. F., ... & Hubacek, K. (2016). Modeling sustainability: population, inequality, consumption, and bidirectional coupling of the Earth and Human Systems. *National Science Review*, 3(4), 470-494. <https://doi.org/10.1093/nsr/nww081>
167. Morello-Frosch, R., Brown, P., Lyson, M., Cohen, A., & Krupa, K. (2011). Community voice, vision, and resilience in post-Hurricane Katrina recovery. *Environmental Justice*, 4(1), 71-80. <https://doi.org/10.1089/env.2010.0029>
168. Morrissey, S. A., & Reser, J. P. (2007). Natural disasters, climate change and mental health considerations for rural Australia. *Australian Journal of Rural Health*, 15(2), 120–125. <https://doi.org/10.1111/j.1440-1584.2007.00865.x>
169. Morss, R. E., Wilhelmi, O. V., Meehl, G. A., & Dilling, L. (2011). Improving societal outcomes of extreme weather in a changing climate: an integrated perspective. *Annual Review of Environment and Resources*, 36, 1-25. <https://doi.org/10.1146/annurev-environ-060809-100145>
170. Moser, S. C. (2013). Navigating the political and emotional terrain of adaptation: Community engagement when climate change comes home. *Successful adaptation to climate change: Linking science and policy in a rapidly changing world*, 289-305.
171. Munro, A., Kovats, R. S., Rubin, G. J., Waite, T. D., Bone, A., Armstrong, B., ... & Oliver, I. (2017). Effect of evacuation and displacement on the association between flooding and mental health outcomes: a cross-sectional analysis of UK survey data. *The Lancet Planetary Health*, 1(4), e134-e141. doi: 10.1016/S2542-5196(17)30047-5
172. Myers, S. S., & Bernstein, A. (2011). The coming health crisis: Indirect health effects of global climate change. *F1000 Biol Rep*, 3(1), 3. doi: 10.3410/B3-3
173. Myers, T.A., M.C. Nisbet, E.W. Maibach, and A.A. Leiserowitz, 2012: A public health frame arouses hopeful emotions about climate change. *Climatic Change*, 113, 1105-1112. <http://dx.doi.org/10.1007/s10584-012-0513-6>
174. Nahar, N., Blomstedt, Y., Wu, B., Kandarina, I., Trisnantoro, L., & Kinsman, J. (2014). Increasing the provision of mental health care for vulnerable, disaster-affected people in Bangladesh. *BMC Public Health*, 14(1). <https://doi.org/10.1186/1471-2458-14-708>
175. Neria, Y., Galea, S., & Norris, F. H. (Eds.). (2009). *Mental health and disasters*. Cambridge University Press.
176. Neria, Y., & Shultz, J. M. (2012). Mental health effects of Hurricane Sandy: characteristics, potential aftermath, and response. *Jama*, 308(24), 2571–2572. 10.1001/jama.2012.110700

177. North, C. S., & Pfefferbaum, B. (2013). Mental health response to community disasters: a systematic review. *Jama*, 310(5), 507-518. doi: 10.1001/jama.2013.107799.
178. Nurse, J., Basher, D., Bone, A., & Bird, W. (2010). An ecological approach to promoting population mental health and well-being - A response to the challenge of climate change. *Perspectives in Public Health*, 130(1), 27-33. <https://doi.org/10.1177/1757913909355221>
179. Oba, N., Suntayakorn, C., Sangkaewsri, R., Longchupol, C., Lohitpintu, I., & Kumsri, T. (2010). The enhancement of adaptation and psychological well-being among victims of flooding and landslide in Thailand. *Journal of the Medical Association of Thailand*, 93(3), 351-357.
180. O'Brien, K., Clair, A. L. S., & Kristoffersen, B. (Eds.). (2010). *Climate change, ethics and human security*. Cambridge University Press.
181. OBrien, L. V., Berry, H. L., Coleman, C., & Hanigan, I. C. (2014). Drought as a mental health exposure. *Environmental Research*, 131, 181-187. <https://doi.org/10.1016/j.envres.2014.03.014>
182. O'Donnell, M. L., & Forbes, D. (2016). Natural disaster, older adults, and mental health-a dangerous combination. *International Psychogeriatrics*, 28(1), 9-10. <https://doi.org/10.1017/S1041610215001891>
183. Ojala, M. (2012). How do children cope with global climate change? Coping strategies, engagement, and well-being. *Journal of Environmental Psychology*, 32(3), 225-233. <https://doi.org/10.1016/j.jenvp.2012.02.004>
184. Ojala, M. (2013). Coping with climate change among adolescents: Implications for subjective well-being and environmental engagement. *Sustainability*, 5(5), 2191-2209. <https://doi.org/10.3390/su5052191>
185. Ojala, M. (2016). Preparing children for the emotional challenges of climate change. *Education in Times of Environmental Crises: Teaching Children to Be Agents of Change*, 210.
186. Opara, C. C. (2014). Climate change phenomenon: Causes, consequences, mitigation and some adaptation strategies in Nigeria. In *The Impact of Climate Change on Sub-Saharan Africa: Case Studies in Cameroon, Nigeria and Uganda Volume 6*, Pages 13-36. ISBN: 978-365304584-0;978-363165347-0
187. Ortega-Egea, J. M., García-de-Frutos, N., & Antolín-López, R. (2014). Why do some people do “more” to mitigate climate change than others? Exploring heterogeneity in psycho-social associations. *PLoS One*, 9(9), e106645. <https://doi.org/10.1371/journal.pone.0106645>
188. Ostry, A., Ogborn, M., Bassil, K. L., Takaro, T. K., & Allen, D. M. (2010). Climate change and health in British Columbia: Projected impacts and a proposed agenda for adaptation research and policy. *International Journal of Environmental Research and Public Health*, 7(3), 1018-1035. <https://doi.org/10.3390/ijerph7031018>
189. Padhy, S. K., Sarkar, S., Panigrahi, M., & Paul, S. (2015). Mental health effects of climate change. *Indian Journal of Occupational and Environmental Medicine*, 19(1), 3-7. <https://doi.org/10.4103/0019-5278.156997>
190. Page, L. A., & Howard, L. M. (2010). The impact of climate change on mental health (but will mental health be discussed at Copenhagen?). *Psychological Medicine*, 40(2), 177-180.

191. Parlee, B., & Furgal, C. (2012). Well-being and environmental change in the arctic: A synthesis of selected research from Canada's International Polar Year program. *Climatic Change*, *115*(1), 13–34. <https://doi.org/10.1007/s10584-012-0588-0>
192. Parsons, M., Glavac, S., Hastings, P., Marshall, G., McGregor, J., McNeill, J., ... Stayner, R. (2016). Top-down assessment of disaster resilience: A conceptual framework using coping and adaptive capacities. *International Journal of Disaster Risk Reduction*, *19*, 1–11. <https://doi.org/10.1016/j.ijdrr.2016.07.005>
193. Phua, K.-L. (2015). Redesigning healthcare systems to meet the health challenges associated with climate change in the twenty-first century. *Journal of Emergency Management*, *13*(3), 255–263. <https://doi.org/10.5055/jem.2015.0239>
194. Polain, J. D., Berry, H. L., & Hoskin, J. O. (2011). Rapid change, climate adversity and the next “big dry”: Older farmers' mental health. *Australian Journal of Rural Health*, *19*(5), 239–243. <https://doi.org/10.1111/j.1440-1584.2011.01219.x>
195. Popovski, V., & Mundy, K. G. (2012). Defining climate-change victims. *Sustainability Science*, *7*(1), 5–16. <https://doi.org/10.1007/s11625-011-0138-0>
196. Powers, J. R., Dobson, A. J., Berry, H. L., Graves, A. M., Hanigan, I. C., & Loxton, D. (2015). Lack of association between drought and mental health in a cohort of 45-61 year old rural Australian women. *Australian and New Zealand Journal of Public Health*, *39*(6), 518–523. <https://doi.org/10.1111/1753-6405.12369>
197. Rahman, M. S., Mohamad, O. B., & Zarim, Z. (2014). Climate change: a review of its health impact and perceived awareness by the young citizens. *Global Journal of Health Science*, *6*(4), 196–204. <https://doi.org/10.5539/gjhs.v6n4p196>
198. Pfefferbaum, R., Pfefferbaum, B., Van Horn, R., 2011. Communities Advancing Resilience Toolkit (CART): The CART Integrated System. Terrorism and Disaster Center at the University of Oklahoma Health Sciences Center, Oklahoma City, OK.
199. Ramsay, T., & Manderson, L. (2011). Resilience, spirituality and posttraumatic growth: reshaping the effects of climate change. In *Climate Change and Human Well-Being*. New York: Springer. ISBN: 978-1-4419-9742-5
200. Rataj, E., Kunzweiler, K., & Garthus-Niegel, S. (2016). Extreme weather events in developing countries and related injuries and mental health disorders - A systematic review. *BMC Public Health*, *16*(1). <https://doi.org/10.1186/s12889-016-3692-7>
201. Reser, J., Bradley, G., & Ellul, M. (2012). Coping with climate change: Bringing psychological adaptation in from the cold. In B. M. & V. Grimaldo (Ed.), *Handbook of the psychology of coping: Psychology of emotions, motivations and actions* (pp. 1–34). United States: Nova Science Publishers. ISBN: 9781620814642
202. Reser, J. P., Morrissey, S. A., & Ellul, M. (2011a). The threat of climate change: Psychological response, adaptation, and impacts. In *Climate Change and Human Well-Being* (pp. 19–42). New York: Springer. ISBN: 978-1-4419-9742-5
203. Reser, J. P., & Swim, and J. K. (2011b). Adapting to and coping with the threat and impacts of climate change. *American Psychologist*, *66*, 277–289. <https://doi.org/doi:10.1037/a0023412>
204. Rice, S. M., & McIver, L. J. (2016). Climate change and mental health: Rationale for research and intervention planning. *Asian Journal of Psychiatry*, *20*, 1–2. DOI:10.1016/j.ajp.2015.12.011
205. Riemer, M., & Reich, S. M. (2011). Community psychology and global climate change: Introduction to the special section. *American Journal of Community Psychology*, *47*(3–4), 349–353. DOI:10.1007/s10464-010-9397-7



206. Rigby, C. W., Rosen, A., Berry, H. L., & Hart, C. R. (2011). If the land's sick, we're sick: The impact of prolonged drought on the social and emotional well-being of Aboriginal communities in rural New South Wales. *Australian Journal of Rural Health, 19*(5), 249–254. <https://doi.org/10.1111/j.1440-1584.2011.01223.x>
207. Rodriguez-Llanes, J. M., Vos, F., & Guha-Sapir, D. (2013). Measuring psychological resilience to disasters: Are evidence-based indicators an achievable goal? *Environmental Health: A Global Access Science Source, 12*(1). <https://doi.org/10.1186/1476-069X-12-115>
208. Roeser, S. (2012). Risk communication, public engagement, and climate change: a role for emotions. *Risk Analysis, 32*(6), 1033–1040. <https://doi.org/10.1111/j.1539-6924.2012.01812.x>
209. Roufeil, L., Gullifer, J., & Maybery, D. (2014). The health challenges facing rural people and communities in Australia: What can psychology offer? *Australian Journal of Rural Health, 22*(6), 271–272. <https://doi.org/10.1111/ajr.12155>
210. Rudolph, L., & Gould, S. (2015). Climate change and health inequities: A framework for action. *Annals of Global Health, 81*(3), 432–444. <https://doi.org/10.1016/j.aogh.2015.06.003>
211. Rufat, S., Tate, E., Burton, C. G., & Maroof, A. S. (2015). Social vulnerability to floods: Review of case studies and implications for measurement. *International Journal of Disaster Risk Reduction, 14*, 470–486. <https://doi.org/10.1016/j.ijdrr.2015.09.013>
212. Sahni, V., Scott, A. N., Beliveau, M., Varughese, M., Dover, D. C., & Talbot, J. (2016). Public health surveillance response following the southern Alberta floods, 2013. *Can J Public Health, 107*(2), 142–148. doi: 10.17269/cjph.107.5188.
213. Saniotis, A., & Irvine, R. (2010). Climate change and the possible health effects on older Australians. *Australian Journal of Primary Health, 16*(3), 217–220. <https://doi.org/10.1071/PY10025>
214. Sapiains, R., Beeton, R. J. S., & Walker, I. A. (2016). Individual responses to climate change: Framing effects on pro-environmental behaviors. *Journal of Applied Social Psychology, 46*(8), 483–493. <https://doi.org/10.1111/jasp.12378>
215. Satcher, D., Friel, S., & Bell, R. (2007). Natural and manmade disasters and mental health. *Journal of the American Medical Association, 298*(21), 2540–2542. <https://doi.org/10.1001/jama.298.21.2540>
216. Schmeltz, M. T., González, S. K., Fuentes, L., Kwan, A., Ortega-Williams, A., & Cowan, L. P. (2013). Lessons from hurricane sandy: A Community response in Brooklyn, New York. *Journal of Urban Health, 90*(5), 799–809. <https://doi.org/10.1007/s11524-013-9832-9>
217. Schrader, S., & Shattell, M. (2013). Cultural cognition: What mental health researchers and clinicians might learn from the climate change debate. *Issues in Mental Health Nursing, 34*(11), 842–843. <https://doi.org/10.3109/01612840.2013.816398>
218. Schulte, P. A., Bhattacharya, A., Butler, C. R., Chun, H. K., Jacklitsch, B., Jacobs, T., ... Wagner, G. R. (2016). Advancing the framework for considering the effects of climate change on worker safety and health. *Journal of Occupational and Environmental Hygiene, 13*(11), 847–865. <https://doi.org/10.1080/15459624.2016.1179388>

219. Schulte, P. A., & Chun, H. (2009). Climate change and occupational safety and health: establishing a preliminary framework. *Journal of Occupational and Environmental Hygiene*, 6(9), 542–554. DOI:10.1080/15459620903066008
220. Shultz, J. M., & Galea, S. (2017). Mitigating the mental and physical health consequences of Hurricane Harvey. *Jama*, 318(15), 1437-1438. doi:10.1001/jama.2017.14618
221. Searle, K., & Gow, K. (2009). Exploring the psychological aspects of risk, fears, and concerns about climate change. *Meltdown: Climate change, natural disasters, and other catastrophes—Fears and concerns of the future*, 31-54.
222. Searle, K., & Gow, K. (2010). Do concerns about climate change lead to distress? *International Journal of Climate Change Strategies and Management*, 2(4), 362–379. <https://doi.org/10.1108/17568691011089891>
223. Selvey, L. A. (2015). Climate change is harmful to our health: Taking action will have many benefits. *Medical Journal of Australia*, 203(10), 397–398. <https://doi.org/10.5694/mja15.00655>
224. Shaw, A., Sheppard, S., & Burch, S. (2009). Making local futures tangible—Synthesizing, downscaling, and visualizing climate change scenarios for participatory capacity building. *Global Environmental Change*, 19 (4). <https://doi.org/10.1016/j.gloenvcha.2009.04.002>
225. Shaw, D., Scully, J., & Hart, T. (2014). The paradox of social resilience: How cognitive strategies and coping mechanisms attenuate and accentuate resilience. *Global Environmental Change*, 25(1), 194–203. <https://doi.org/10.1016/j.gloenvcha.2014.01.006>
226. Sharifi, A. (2016). A critical review of selected tools for assessing community resilience. *Ecological Indicators*, 69, 629–647. <https://doi.org/10.1016/j.ecolind.2016.05.023>
227. Shukla, J. (2013). Extreme weather events and mental health: Tackling the psychosocial challenge. *ISRN public health*, 2013. <http://dx.doi.org/10.1155/2013/127365>
228. Silove, D., Steel, Z., & Psychol, M. (2006). Understanding community psychosocial needs after disasters: Implications for mental health services. *Journal of Postgraduate Medicine*, 52(2), 121.
229. Smoyer-Tomic, K. E., Klaver, J. D., Soskolne, C. L., & Spady, D. W. (2004). Health consequences of drought on the Canadian prairies. *EcoHealth*, 1(2), SU144-SU154.
230. Simpson, D. M., Weissbecker, I., & Sephton, S. E. (2011). Extreme weather-related events: Implications for mental health and well-being. In *Climate Change and Human Well-Being* (pp. 57–78). New York: Springer. ISBN: 978-1-4419-9742-5
231. Spence, A., Poortinga, W., & Pidgeon, N. (2012). The psychological distance of climate change. *Risk Analysis*, 32(6), 957–972. <https://doi.org/10.1016/j.envsci.2017.04.011>
232. Stain, H. J., Kelly, B., Carr, V. J., Lewin, T. J., Fitzgerald, M., & Fragar, L. (2011). The psychological impact of chronic environmental adversity: Responding to prolonged drought. *Social Science & Medicine*, 73(11), 1593–1599. doi: 10.1016/j.socscimed.2011.09.016
233. Stanke, C., Murray, V., Amlôt, R., Nurse, J., & Williams, R. (2012). The effects of flooding on mental health: Outcomes and recommendations from a review of the literature. *PLoS currents*, 4.

234. Stedman, R. C. (2004). Risk and climate change: perceptions of key policy actors in Canada. *Risk Analysis*, 24(5), 1395–1406. DOI:10.1111/j.0272-4332.2004.00534.x
235. Stephenson, J., Vaganay, M., Cameron, R., & Joseph, P. (2014). The long-term health impacts of repeated flood events. *WIT Transactions on Ecology and the Environment*, 184, 201–212. <https://doi.org/10.2495/FRIAR140171238>.
236. Stuart, K., Mahmood, M. A., Clark, L., & Pace, R. (2011). Health education and a co-ordinated response system to support vulnerable people during heat waves. *Australian and New Zealand Journal of Public Health*, 35(4), 394–39. <https://doi.org/10.1111/j.1753-6405.2011.00749.x>
237. Sung, T.-I., Chen, M.-J., Lin, C.-Y., Lung, S.-C., & Su, H.-J. (2011). Relationship between mean daily ambient temperature range and hospital admissions for schizophrenia: Results from a national cohort of psychiatric inpatients. *Science of the Total Environment*, 410–411, 41–46. <https://doi.org/10.1016/j.scitotenv.2011.09.028>
238. Swim, J., Clayton, S., Doherty, T., Gifford, R., Howard, G., Reser, J., & Weber, E. (2009). Psychology and global climate change: Addressing a multi-faceted phenomenon and set of challenges. A report by the American Psychological Association’s task force on the interface between psychology and global climate change. Washington: American Psychological Association.
239. Swim, J. K., Clayton, S., & Howard, G. S. (2011). Human behavioral contributions to climate change: Psychological and contextual drivers. *American Psychologist*, 66(4), 251. DOI:10.1037/a0023472
240. Swim, J. K., Stern, P. C., Doherty, T. J., Clayton, S., Reser, J. P., Weber, E. U., & Howard, G. S. (2011). Psychology’s contributions to understanding and addressing global climate change. *American Psychologist*, 66(4), 241. <http://dx.doi.org/10.1037/a0023220>
241. Syal, S. S., Wilson, R. S., Crawford, J. M., & Lutz, J. (2011). Climate change and human health-what influences the adoption of adaptation programming in the United States public health system? *Mitigation and Adaptation Strategies for Global Change*, 16(8), 911–924. <https://doi.org/10.1007/s11027-011-9302-1>
242. Tapsell, S. (2010). Socio-Psychological Dimensions of Flood Risk Management. In Pender, G., & Faulkner, H. (Eds.). (2010). *Flood risk science and management*. John Wiley & Sons. ISBN: 9781444324846
243. 246. Thomas, F., Sabel, C. E., Morton, K., Hiscock, R., & Depledge, M. H. (2014). Extended impacts of climate change on health ‘and wellbeing. *Environmental Science and Policy*, 44, 271–278. <https://doi.org/10.1016/j.envsci.2014.08.011>
244. Thornley, L., Ball, J., Signal, L., Lawson-Te Aho, K., & Rawson, E. (2015). Building community resilience: learning from the Canterbury earthquakes. *Kotuitui*, 10(1), 23–35. <https://doi.org/10.1080/1177083X.2014.934846>
245. Tierney, K. (2014). *The social roots of risk: Producing disasters, promoting resilience*. Stanford University Press. 9780804791403.
246. THRIVE, 2004. A Community Approach to Address Health Disparities: Toolkit for Health & Resilience In Vulnerable Environments. Prevention Institute <http://www.preventioninstitute.org/component/jlibrary/article/id-96/127.html>.

247. Tobias, J. K., & Richmond, C. A. M. (2014). “That land means everything to us as Anishinaabe. . .”: Environmental dispossession and resilience on the North Shore of Lake Superior. *Health and Place*, 29, 26–33. <https://doi.org/10.1016/j.healthplace.2014.05.008>
248. Tong, S., Mather, P., Fitzgerald, G., McRae, D., Verrall, K., & Walker, D. (2010). Assessing the vulnerability of eco-environmental health to climate change. *International Journal of Environmental Research and Public Health*, 7(2), 546–564. <https://doi.org/10.3390/ijerph7020546>
249. Tonna, A., Kelly, B., Crockett, J., Buss, R., Roberts, R., Wright, M., & Greig, J. (2009). Improving the mental health of drought affected communities. *An Australian model. Rural Society*, 19(4), 296–305. <https://doi.org/10.5172/rsj.351.19.4.296>
250. Tosone, C., McTighe, J. P., & Bauwens, J. (2015). Shared Traumatic Stress among Social Workers in the Aftermath of Hurricane Katrina. *British Journal of Social Work*, 45(4), 1313–1329. <https://doi.org/10.1093/bjsw/bct194>
251. Trombley, J., Chalupka, S., & Anderko, L. (2017). Climate Change and Mental Health. *AJN The American Journal of Nursing*, 117(4), 44–52. DOI: 10.1097/01.NAJ.0000515232.51795.fa
252. Trang, P. M., Rocklöv, J., Giang, K. B., Kullgren, G., & Nilsson, M. (2016). Heatwaves and hospital admissions for mental disorders in Northern Vietnam e0155609. *PLoS ONE*, 11(5). <https://doi.org/10.1371/journal.pone.0155609>
253. Truelove, H. B., Carrico, A. R., & Thabrew, L. (2015). A socio-psychological model for analyzing climate change adaptation: A case study of Sri Lankan paddy farmers. *Global Environmental Change*, 31, 85–97. <https://doi.org/10.1016/j.gloenvcha.2014.12.010>
254. Turner, L. R., Alderman, K., & Tong, S. (2012). The 2011 Brisbane floods affected residents’ health. *Medical Journal of Australia*, 197(4), 214–216. <https://doi.org/10.5694/mja12.10724>
255. Tunstall, S., Tapsell, S., Green, C., Floyd, P., & George, C. (2006). The health effects of flooding: social research results from England and Wales. *Journal of water and health*, 4(3), 365-380.
256. Van Kessel, G., Macdougall, C., & Gibbs, L. (2014). Resilience - Rhetoric to reality: A systematic review of intervention studies after disasters. *Disaster Medicine and Public Health Preparedness*, 8(5), 452–460. <https://doi.org/10.1017/dmp.2014.104>
257. Vasseur, L., Thornbush, M., & Plante, S. (2015). Gender-based experiences and perceptions after the 2010 winter storms in Atlantic Canada. *International journal of environmental research and public health*, 12(10), 12518-12529. DOI: 10.3390/ijerph121012518
258. Verplanken, B., & Roy, D. (2013). “My Worries Are Rational, Climate Change Is Not”: Habitual Ecological Worrying Is an Adaptive Response. *PLoS ONE*, 8(9). <https://doi.org/10.1371/journal.pone.0074708>
259. Vida, S., Durocher, M., Ouarda, T. B., & Gosselin, P. (2012). Relationship between ambient temperature and humidity and visits to mental health emergency departments in Quebec. *Psychiatric Services*, 63(11), 1150-1153. DOI:10.1176/appi.ps.201100485.

260. Vins, H., Bell, J., Saha, S., & Hess, J. J. (2015). The mental health outcomes of drought: A systematic review and causal process diagram. *International Journal of Environmental Research and Public Health*, *12*(10), 13251–13275. <https://doi.org/10.3390/ijerph121013251>
261. Wainwright, T. (2009). Climate change and refocusing clinical psychology. *Clinical Psychology Forum*, (200), 7–11.
262. Waite, T. D., Chaintarli, K., Beck, C. R., Bone, A., Amlôt, R., Kovats, S., ... & Oliver, I. (2017). The English national cohort study of flooding and health: cross-sectional analysis of mental health outcomes at year one. *BMC public health*, *17*(1), 129. <https://doi.org/10.1186/s12889-016-4000-2>
263. Wang, X., Lavigne, E., Ouellette-kuntz, H., & Chen, B. E. (2014). Acute impacts of extreme temperature exposure on emergency room admissions related to mental and behavior disorders in Toronto, Canada. *Journal of affective disorders*, *155*, 154-161. <https://doi.org/10.1016/j.jad.2013.10.042>
264. Weissbecker, I. (2011). Climate change and human well-being. Springer Fachmedien. ISBN: 978-1-4419-9742-5
265. Wenden, A. L. (2011). Women and climate change: Vulnerabilities and challenges. In *Climate Change and Human Well-Being*. New York: Springer. ISBN: 978-1-4419-9742-5
266. West, C., Bernard, B., Mueller, C., Kitt, M., Driscoll, R., & Tak, S. (2008). Mental health outcomes in police personnel after Hurricane Katrina. *Journal of Occupational and Environmental Medicine*, *50*(6), 689–695. DOI:10.1097/JOM.0b013e3181638685.
267. White, R. G., Imperiale, M. G., & Perera, E. (2016). The Capabilities Approach: Fostering contexts for enhancing mental health and wellbeing across the globe. *Globalization and Health*, *12*(1). <https://doi.org/10.1186/s12992-016-0150-3>
268. Wilby, R. L., & Keenan, R. (2012). Adapting to flood risk under climate change. *Progress in Physical Geography*, *36*(3), 348–378. <https://doi.org/10.1177/0309133312438908>
269. Wilson, S. M., Richard, R., Joseph, L., & Williams, E. (2010). Climate change, environmental justice, and vulnerability: an exploratory spatial analysis. *Environmental Justice*, *3*(1), 13–19. DOI: 10.1089/env.2009.0035
270. Winkler, M. S., Rösli, M., Ragetti, M. S., Cissé, G., Müller, P., Utzinger, J., & Perez, L. (2015). Mitigating and adapting to climate change: a call to public health professionals. *International Journal of Public Health*, *6*, 631-2. DOI:10.1007/s00038-015-0722-7
271. Wolf, J., Allice, I., & Bell, T. (2015). Values and traditional practices in adaptation to climate change. Evidence from a Q method study in two communities in Labrador, Canada. Cambridge University Press <https://doi.org/10.1017/CBO9781139149389.011>
272. Wolkin, A., Patterson, J. R., Harris, S., Soler, E., Burrer, S., McGeehin, M., & Greene, S. (2015). Reducing Public Health Risk during Disasters: Identifying Social Vulnerabilities. *Journal of Homeland Security and Emergency Management*, *12*(4), 809–822. <https://doi.org/10.1515/jhsem-2014-0104>
273. Wulff, K., Donato, D., & Lurie, N. (2015). What is health resilience and how can we build it? *Annual Review of Public Health*, *36*, 361–374. <https://doi.org/10.1146/annurev-publhealth-031914-122829>

274. Yusa, A., Berry, P., J Cheng, J., Ogden, N., Bonsal, B., Stewart, R., & Waldick, R. (2015). Climate change, drought and human health in Canada. *International journal of environmental research and public health*, 12(7), 8359-8412. DOI:10.3390/ijerph120708359.
275. Zakour, M. J., & Gillespie, D. F. (2013). Community disaster vulnerability. *Theory, Research, and Practice*, NY: Springer. ISBN: 978-1-4614-5737-4
276. Zaremohzzabieh, Z., & Samah, B. A. (2013). A review paper: The role of the internet in promoting youth well-being in flood-prone communities. *Asian Social Science*, 9(11), 75–82. <https://doi.org/10.5539/ass.v9n11p75>
